# 1 Chromatin dynamics associated with sexual differentiation in a UV sex 2 determination system

3 Josselin Gueno<sup>1</sup>, Simon Bourdareau<sup>1</sup>, Guillaume Cossard<sup>1</sup>, Olivier Godfroy<sup>1</sup>, Agnieszka  
4 Lipinska<sup>1,2</sup>, Leila Tirichine<sup>3</sup>, J. Mark Cock<sup>1\*</sup>, Susana M. Coelho<sup>1,2\*</sup>

5 <sup>1</sup>Sorbonne Université, UPMC Univ Paris 06, CNRS, Algal Genetics Group, UMR 8227, Integrative Biology of  
6 Marine Models, Station Biologique de Roscoff, CS 90074, F-29688, Roscoff, France. <sup>2</sup>Department of Algal  
7 Development and Evolution, Max Planck Institute for Developmental Biology, 72076 Tübingen, Germany

8 <sup>3</sup>Université de Nantes, CNRS, UFIP, UMR 6286, F-44000 Nantes, France

9 \*Correspondence: [susana.coelho@tuebingen.mpg.de](mailto:susana.coelho@tuebingen.mpg.de); [cock@sb-roscoff.fr](mailto:cock@sb-roscoff.fr)

## 10 Summary

11 In many eukaryotes, such as dioicous mosses and many algae, sex is determined by UV sex  
12 chromosomes and is expressed during the haploid phase of the life cycle. In these species, the  
13 male and female developmental programs are initiated by the presence of the U- or V-specific  
14 regions of the sex chromosomes but, as in XY and ZW systems, phenotypic differentiation is  
15 largely driven by autosomal sex-biased gene expression. The mechanisms underlying sex-  
16 biased transcription in XY, ZW or UV sexual systems currently remain elusive. Here, we set out  
17 to understand the extent and nature of epigenomic changes associated with sexual  
18 differentiation in the brown alga *Ectocarpus*, which has a well described UV system. Five  
19 histone modifications, H3K4me3, H3K27Ac, H3K9Ac, H3K36me3, H4K20me3, were quantified  
20 in near-isogenic male and female lines, leading to the identification of 13 different chromatin  
21 states across the *Ectocarpus* genome that showed different patterns of enrichment at  
22 transcribed, silent, housekeeping or narrowly-expressed genes. Chromatin states were  
23 strongly correlated with levels of gene expression indicating a relationship between the  
24 assayed marks and gene transcription. The relative proportion of each chromatin state across  
25 the genome remained stable in males and females, but a subset of genes exhibited different  
26 chromatin states in the two sexes. In particular, males and females displayed distinct patterns  
27 of histone modifications at sex-biased genes, indicating that chromatin state transitions occur  
28 preferentially at genes involved in sex-specific pathways. Finally, our results reveal a unique  
29 chromatin landscape of the U and V sex chromosomes compared to autosomes. Taken  
30 together, our observations reveal a role for histone modifications in sex determination and  
31 sexual differentiation in a UV sexual system, and suggest that the mechanisms of epigenetic  
32 regulation of genes on the UV sex chromosomes may differ from those operating on  
33 autosomal genes.

## 34 Introduction

35 In species that reproduce sexually, sex is often determined by a pair of sex chromosomes: X  
36 and Y chromosomes in male-heterogametic species, Z and W in female-heterogametic species  
37 or U and V in haploid sexual systems (Bachtrog et al., 2014). Sex chromosomes originate from  
38 pairs of autosomes, but become differentiated after the sex-specific chromosome (Y, W or  
39 both the V and U) stops recombining (Bachtrog et al., 2014; Charlesworth, 2017; Umen and  
40 Coelho, 2019). Males and females have distinct sex chromosome sets but the extensive  
41 phenotypic differences between males and females (sexual dimorphism) are largely caused  
42 by differences in autosomal gene expression, so-called sex-biased gene expression. The nature  
43 and extent of sex-biased gene expression has been investigated in recent years across a broad  
44 range of taxa using genome-wide transcriptional profiling. These studies have revealed that  
45 sex-biased gene expression is common in many species, although its extent may vary greatly  
46 among tissues or developmental stages (reviewed in Grath and Parsch, 2016).

47 Although many reports have described patterns and evolution of sex-biased genes across  
48 several taxa, the molecular mechanisms underlying the regulation of sex-biased expression of  
49 hundreds, or even thousands, of genes during sexual differentiation remain poorly  
50 understood. One possible mechanism to regulate gene expression is through epigenetic  
51 modifications. Epigenetic modifications are defined as reversible changes that affect the  
52 genomic structure and regulate gene expression without affecting the DNA sequence itself  
53 (Allis and Jenuwein, 2016). Epigenetic modifications may occur through mechanisms such as  
54 DNA methylation and histone post-translational modifications (PTMs). DNA methylation  
55 regulates transcription in diverse eukaryotes (reviewed in Jones, 2012), and may contribute  
56 to transcriptional differences between sexes (Nugent et al., 2015), playing for instance an  
57 important role in differentiating female morphs (workers and queens) in the honeybee  
58 (Elango et al., 2009). In the liverwort *Marchantia*, male and female gametes have different  
59 levels of DNA methylation and this is correlated with differences in the expression of genes  
60 involved in DNA methylation (Schmid et al., 2018). Histone PTMs are another important  
61 component of transcriptional regulation, and can impact gene expression by altering  
62 chromatin structure or recruiting histone modifiers. Combination of histone PTMs (so-called  
63 chromatin states) are associated with functionally distinct regions of the genome such as  
64 heterochromatic regions and regions of either active transcription or repression (Kouzarides,  
65 2007). The role of chromatin states in regulating gene expression patterns during  
66 development in animals is well established (Lindeman et al., 2010; Srivastava et al., 2010).  
67 However, very few studies have carried out chromatin profiling during sexual differentiation  
68 to link profiles with sex-biased expression patterns. The only available study, to our  
69 knowledge, described genome-wide maps of histone PTMs coupled with gene expression data

70 to decipher the relationship between the chromatin states and sex-biased gene expression in  
71 *Drosophila miranda* (Brown and Bachtrog, 2014). In this study, the genome-wide distribution  
72 of both active and repressive chromatin states differed between males and females but sex-  
73 specific chromatin states appeared not to explain sex-biased expression of genes.

74 In organisms with XY or ZW sex determination systems, sex chromosomes often exhibit unique  
75 patterns of gene expression and unusual patterns of epigenetic marks compared with  
76 autosomes (e.g. Brown and Bachtrog, 2014; Schmid et al., 2018). For instance, in *Drosophila*  
77 males, where the Y is transcriptionally repressed and the X is hyper-transcribed (Baker et al.,  
78 1994), both of these transcriptional modifications are correlated with changes in the  
79 chromatin configuration (Gelbart and Kuroda, 2009; Girton and Johansen, 2008; Lemos et al.,  
80 2010; Straub and Becker, 2007). Sex chromosomes are derived from autosomes, but they are  
81 governed by unique evolutionary and functional pressures (Bachtrog, 2006). The sex-limited  
82 chromosome (Y or W) degenerates, i.e., loses most of its ancestral gene content, accumulates  
83 repetitive DNA and evolves a heterochromatic appearance (Bachtrog, 2013; Charlesworth and  
84 Charlesworth, 2000) whereas the homologous chromosome (X or Z) acquires mechanisms to  
85 compensate and evolves hyper-transcription (dosage compensation) (Lucchesi et al., 2005;  
86 Picard et al., 2018; Vicoso and Charlesworth, 2009). In *Drosophila* the  
87 euchromatin/heterochromatin ratio is different in the two sexes mainly due to the presence  
88 of the repeat-rich Y chromosome in males (Brown and Bachtrog, 2014; Yasuhara and  
89 Wakimoto, 2008). Similarly, the Z-specific region in schistosomes has a unique chromatin  
90 landscape, dominated by gene-activation-associated histone PTMs, that is associated with  
91 dosage compensation (Picard et al., 2019).

92 At present, no information is available concerning the regulation of gene expression by  
93 chromatin remodelling in organisms with UV sexual systems, such as mosses and algae  
94 (Coelho et al., 2018), although recent work has analysed the patterns of histone post  
95 translational modifications during the haploid-diploid life cycle of the brown alga *Ectocarpus*  
96 (Bourdareau et al., 2020). In UV sexual systems, sex is expressed during the haploid phase of  
97 the life cycle. Inheritance of a U or a V sex chromosome after meiosis determines whether the  
98 multicellular adult individual will be female or male, respectively (Bachtrog et al., 2014; Coelho  
99 et al., 2019). UV systems differ markedly from XY and ZW systems (Bull, 1978; Coelho et al.,  
100 2019; Umen and Coelho, 2019). For example, the two sexes are not homozygotic and  
101 heterozygotic so mechanisms such as chromosome-scale dosage compensation or meiotic sex  
102 chromosome inactivation are not expected. Moreover, whereas Y or W sex chromosomes  
103 often undergo genetic degeneration resulting in them being markedly different to their  
104 partner X or Z chromosome in terms of size, repeat content and gene density, U and V  
105 chromosomes do not tend to exhibit this type of asymmetry because each chromosome

106 functions independently in a haploid context and therefore experiences similar evolutionary  
107 pressures (Ahmed et al., 2014).

108 The expression pattern of the genes located on U and V sex chromosomes has been shown to  
109 differ from that of the autosomal gene set (Coelho et al., 2019). For example, in the brown  
110 alga *Ectocarpus*, most sex-linked genes are upregulated during the haploid, gametophyte  
111 phase of the life cycle (Ahmed et al., 2014; Lipinska et al., 2017). The pseudo-autosomal  
112 regions (PARs) of the sex chromosomes are enriched in both life cycle-related genes  
113 (sporophyte-biased genes) and female-biased genes, compared to the autosomes (Lipinska et  
114 al., 2015). Moreover, PAR genes display unusual structural features compared with autosomal  
115 genes in terms of their GC content, repeat content and intron sizes (Avia et al., 2018;  
116 Luthringer et al., 2015).

117 Here, we investigated the sex-related chromatin landscape of *Ectocarpus*, a model brown alga  
118 with a UV sexual system. Comparison of the profiles of five histone PTMs with transcriptomic  
119 data showed that chromatin states were predictive of transcript abundance. The chromatin  
120 state of genes that exhibited sex-biased expression was markedly different in males and  
121 females indicating that histone modifications may play an important role in mediating sexual  
122 differentiation. Moreover, an important subset of the PAR genes presented sex-specific  
123 chromatin patterns. The U and V sex chromosomes were found to have very different  
124 chromatin landscapes to autosomes, despite the absence of a requirement for chromosome-  
125 scale dosage compensation in *Ectocarpus* and the fact that the U and V chromosomes do not  
126 exhibit strong signs of genetic degeneration.

## 127 Results

### 128 Identification of chromatin states in males and females of *Ectocarpus* sp.

129 Near-isogenic male and female gametophyte lines (Table S1, Figure S1) were used to generate  
130 sex-specific chromatin immunoprecipitation and sequencing (ChIP-seq) profiles for five  
131 different histone PTMs: H3K4me3, H3K9ac, H3K27ac, H3K36me3 and H4K20me3 (Table S2).  
132 H3K4me3 is a near-universal chromatin modification that has been found at the transcription  
133 start sites (TSS) of expressed genes in a range of eukaryotes, and is associated with gene  
134 transcription (Barski et al., 2007; He et al., 2010; Howe et al., 2017). H3K9ac is a chromatin  
135 mark that is often associated with ongoing transcription in both animals and land plants  
136 (Brusslan et al., 2015; Heintzman et al., 2007). H3K27ac is an important mark that can  
137 distinguish between active and poised enhancer elements in animals (Creyghton et al., 2010).  
138 H3K36me3 is a gene body mark associated with active gene transcription in animals and plants  
139 (Roudier et al., 2011; Shilatifard, 2006). H4K20me3 is a repressive, constitutive

140 heterochromatin mark but also silences repetitive DNA and transposons. H4K20me3 is  
141 generally associated with heterochromatin but its presence at gene bodies has been inversely  
142 correlated with gene expression in animals (Nelson et al., 2016; Schotta et al., 2004).

143 Given the large phylogenetic distances separating the brown algae from the animal and land  
144 plant lineages and the independent evolution of multicellularity in each of these three lineages  
145 (Cock et al., 2010), it is possible that the five histone PTMs analysed here are not associated  
146 with the same functions in brown algae as they are in animals and land plants. However, a  
147 previous analysis of histone PTMs in *Ectocarpus*, which included the marks tested here  
148 (Bourdareau et al., 2020), afforded evidence for similar roles. Peaks of H3K9ac, H3K27ac and  
149 H3K4me3 were detected within 500 bp of transcription start sites (TSSs). H3K36me3 and  
150 H4K20me3 were depleted from TSSs and transcription end sites (TESs), being associated with  
151 gene bodies and H4K20me3 was also present in intergenic regions. Together, the five histone  
152 PTMs used in our study are therefore expected to provide a broad overview of the *Ectocarpus*  
153 sp. chromatin landscape in male and female algae.

154 Thirteen chromatin states (i.e., different combinatorial patterns of histone PTMs) were  
155 defined in the *Ectocarpus* genome based on analysis of the genome-wide distribution patterns  
156 of the five histone PTMs using MACS2 (Zhang et al., 2008) and SICER (Xu et al., 2014) (Figure  
157 1A). States S9-S13 consisted of combinations of histone marks that are usually associated with  
158 active transcription (presence of H3K36me3, H3K27ac, H3K9ac, H3K4me3) (Bourdareau,  
159 2018). States S2-S8 all included H4K20me3, in most cases in addition to one or more of the  
160 above gene activation-associated marks. State S1 corresponded to a 'background' state, i.e.,  
161 domains that were not enriched for any of the histone PTMs assayed. An example of histone  
162 PTM profiles for a 20 kbp region of the *Ectocarpus* genome is shown in Figure 1B.

### 163 **Chromatin states of different categories of *Ectocarpus* genes**

164 To elucidate the relationship between the observed chromatin states and the expression  
165 patterns of *Ectocarpus* sp. genes, RNA-seq data was generated using the same biological  
166 samples as were used for the ChIP-seq analysis (see methods) and these data, together with  
167 previously published datasets (Lipinska et al., 2015, 2017, 2013), were used to define four  
168 categories of genes based on their expression patterns: transcribed genes (TPM $\geq$ 5th  
169 percentile), silent genes (TPM $<$ 5th percentile), housekeeping genes (i.e. broadly expressed  
170 genes defined as having values of less than 0.25 for the tissue specificity index tau; see  
171 methods) and narrowly expressed genes (tau $>$ 0.75; see methods). The housekeeping and  
172 narrowly expressed genes (NEGs) were subsets of the transcribed gene set.

173 The most common chromatin state for the transcribed genes (32.9% and 33.9% in males and  
174 females respectively) was S13, which corresponds to co-localisation of all four of the histone

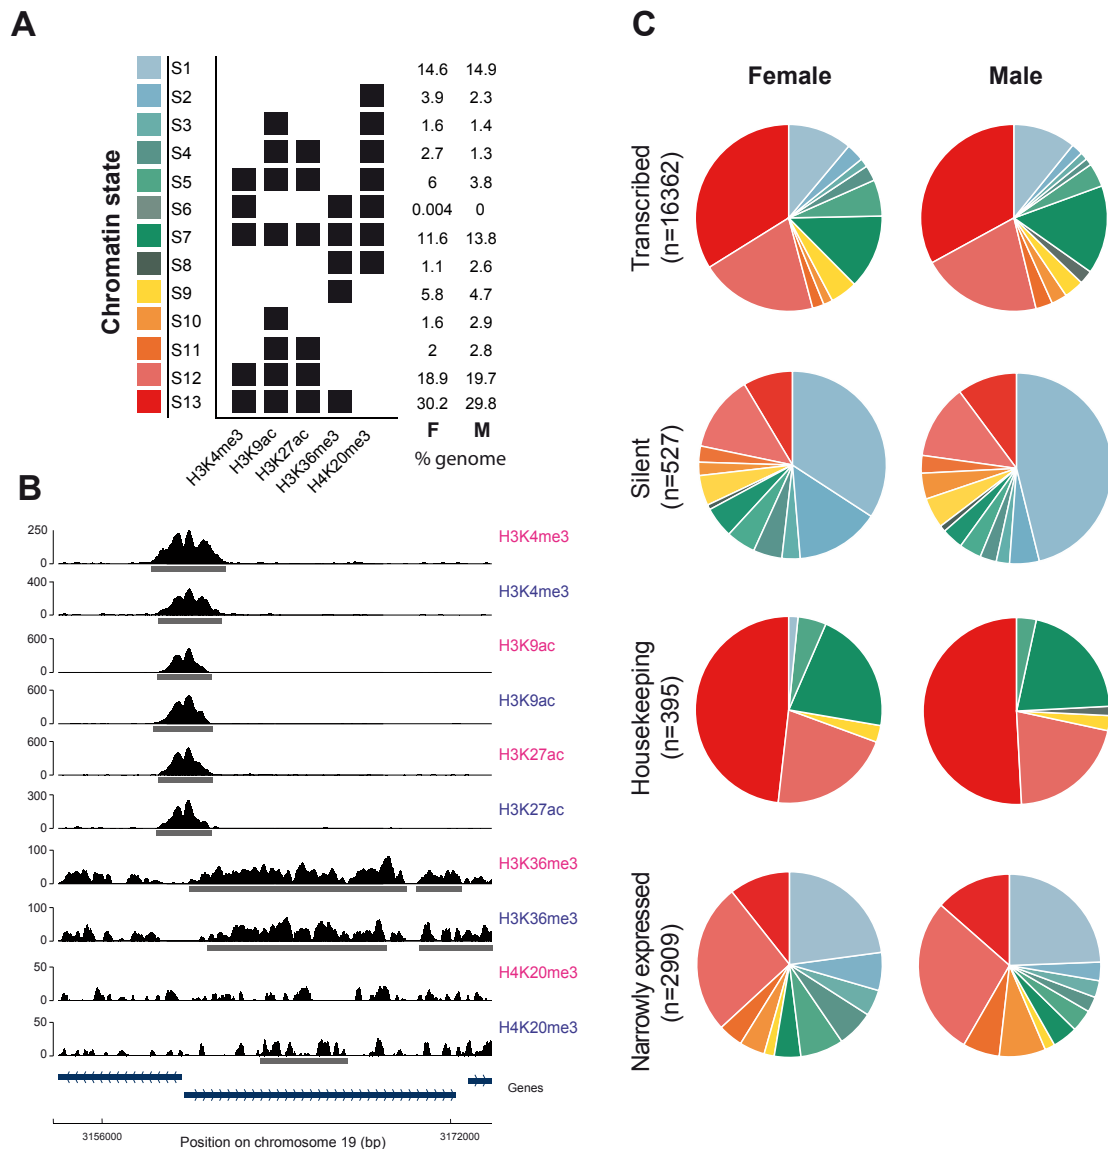

**Figure 1. The chromatin landscape of male and female *Ectocarpus* sp.** A) Summary of the 13 chromatin states detected in *Ectocarpus* sp. Percentages of the total gene set associated with each chromatin state in males (M) and females (F) are shown to the right. B) Representative region of the chromosome 19 showing profiles of mapped ChIP-seq reads for the five histone PTMs in males and females. Grey bars represent the peaks detected by MACS2 (H3K4me3, H3K9ac and H3K27ac) or SICER (H3K36me3 and H4K20me3). Blue bars represent genes. Pink text, females; blue text, males. C) Proportions of transcribed (TPM $\geq$ 5th percentile), silent (TPM<5th percentile), housekeeping ( $\tau < 0.25$ ) and narrowly expressed genes ( $\tau > 0.75$ ) associated with each chromatin state in males and females.

175 PTMs that are generally associated with gene activation (H3K36me3, H3K27ac, H3K9ac,  
 176 H3K4me3; Figure 1C, Table S3). For the ‘silent’ category of genes, S1 (no detectable histone  
 177 PTM peak) was the most common state (45.4% and 34.0% in males and females, respectively;  
 178 Figure 1C, Table S3). Housekeeping (broadly expressed) genes and NEGs have been shown to  
 179 have distinct patterns of chromatin PTMs in *Drosophila* (Brown and Bachtrog, 2014; Fillion et  
 180 al., 2010). The majority (50.9% and 48.2% in males and females, respectively) of the  
 181 housekeeping genes in *Ectocarpus* were associated with state S13 (all four marks associated  
 182 with activation) whereas NEGs exhibited no clearly preferred state, the most common state

183 being S12 (H3K4me3, H3K9ac, H3K27ac; 28.2% and 26.2% in males and females, respectively;  
184 Figure 1C, Table S3). States that included H4K20me3 were more common at NEGs than at  
185 housekeeping genes. Conversely, states associated with H3K36me3 (S6-S9 and S13) were  
186 characteristic of housekeeping genes (i.e., 75.9% and 72.3% of the housekeeping genes in  
187 males and females respectively had H3K36me3), and this mark was distinctly less prevalent  
188 on NEGs (19.8% and 17.1% in males and females respectively; Figure 1C, Table S3, Table S4).  
189 Finally, the background state S1 (none of the tested marks associated) was markedly more  
190 frequent at NEGs than at housekeeping genes. Together, these data support the association  
191 of the tested marks with active or repressed chromatin states in *Ectocarpus*.

192 When the relative proportions of the chromatin states were compared between males and  
193 females for each of the four gene categories (transcribed, silent, housekeeping and narrowly  
194 expressed), broadly similar patterns were observed in the two sexes, but some small  
195 differences were also noticeable (Figure 1C, Table S3). For example, less than 1% of the  
196 transcribed genes corresponded to state S8 (i.e., combination of H3K36me3 and H4K20me3)  
197 in females, compared to 2.4% in males (Table S3). Also, state S6 (combination of H3K4me3,  
198 H3K36me3 and H4K20me3) was exclusively present in a small subset of genes in females.  
199 Taken together, these results indicate that overall, the relative proportions of the different  
200 chromatin states across the genome remain relatively stable in males versus females.

### 201 **Identification of histone PTMs associated with gene activation and gene repression**

202 To further investigate the relationship between the observed chromatin states and gene  
203 expression, transcript abundances in both males and females were plotted for the sets of  
204 genes corresponding to each chromatin state. A clear trend towards increasingly higher levels  
205 of transcript abundance was correlated with the gradual acquisition of the histone PTMs  
206 H3K9ac, H3K27ac, H3K4me3 and H3K36me3 (in the following order: H3K9ac followed by  
207 H3K9ac/H3K27ac, then by H3K9ac/H3K27ac/H3K4me3 and finally by  
208 H3K9ac/H3K27ac/H3K4me3/H3K36me3; Figure 2A; Table S5, S6). These observations support  
209 the proposed association of these four histone PTMs with gene activation (Bourdareau et al.,  
210 2020). These results also suggest that there may be a hierarchy in terms of the deposition of  
211 these histone PTMs, with addition of later marks being dependent on the presence of earlier  
212 ones in the order H3K9ac, H3K27ac, H3K4me3 and H3K36me3.

213 In pairwise comparisons, sets of genes corresponding to chromatin states that included  
214 H4K20me3 consistently exhibited lower transcript abundance than sets of genes with  
215 equivalent chromatin states without H4K20me3 (e.g. transcript abundance was significantly  
216 lower for S7 than for S13; Wilcox test, p-value= 4.463E-18 Figure 2A; Table S5, S6). These  
217 results are consistent with H4K20me3 playing a role in the repression of gene expression in

218 *Ectocarpus*. Note however that because H4K20me3 is frequently associated with transposons  
219 (Bourdareau et al., 2020), the observed association with transcriptional repression could also  
220 be indirect, via the silencing of intronic transposon sequences.

221 Finally, the background state S1 corresponds to domains that are not associated with any of  
222 the assayed histone PTMs, and *Ectocarpus* genes associated with state S1 exhibited very low  
223 transcript abundance (Figure 2A, Table S5, S6).

224 Analysis of the RNA-seq data also indicated some differences between the sexes. For example,  
225 on average, genes in chromatin state S1, S11 and S12 had significantly higher expression levels  
226 in females compared with males (pairwise Wilcoxon, p-value=2.4E-7; p-value=0.02 and p-  
227 value=0.001, respectively; Figure 2A). Conversely, on average, genes in chromatin state S2 and  
228 S3 had lower expression levels in females than in males (pairwise Wilcoxon, p-value=6.3E-8,  
229 p-value=3.4E-8; Figure 2A, Table S5, S6).

230 To further examine the link between chromatin states and transcript abundances in males and  
231 females, we classified states S1 and S2 (absence of any of the tested marks or presence of only  
232 H4K20me3) as 'repressive' chromatin states, while states S9-S13 were classified as 'active'  
233 chromatin states (presence of at least one canonical activation-associated mark H3K9ac,  
234 H3K27ac, H3K4me3 and/or H3K36me3). Note that we did not include genes with states S3-S7  
235 in this analysis because they exhibited a combination of repression-associated (H4K20me3)  
236 and activation-associated marks and because they were expressed at intermediate levels  
237 (Figure 2A). As expected, genes marked with states S9-S13 were expressed at higher levels in  
238 both sexes than those that were associated with states S1 and S2 (Figure 2B; pair-wise Wilcox  
239 test, p-value<2E-16). Interestingly, levels of gene expression in males and females were also  
240 significantly different for genes marked with states S9-S13 in one sex but with states S1 and  
241 S2 in the other (Figure 2B; pair-wise Wilcox test, p-value<2E-16). Therefore, sex-specific  
242 differences in the chromatin states of genes were associated with sex-specific expression  
243 patterns.



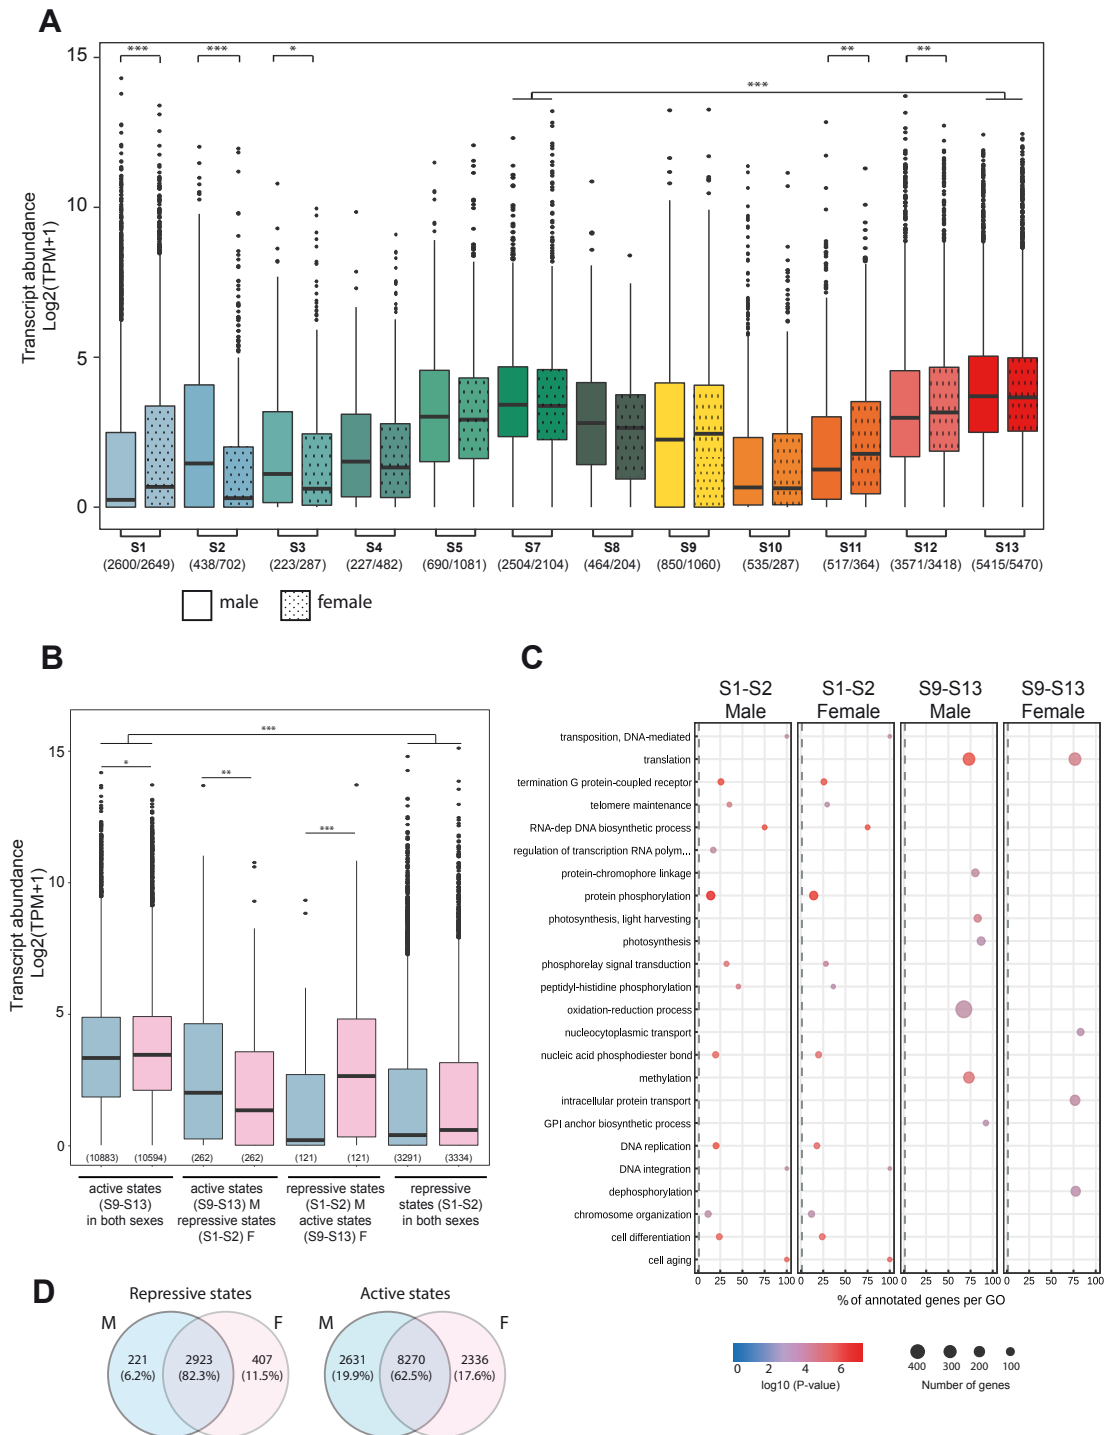

**Figure 2. Gene expression and chromatin states.** A) Transcript abundances for genes associated with different chromatin states in males and females. The colour code is the same as that used in Figure 1A. The numbers of genes associated with each state are indicated in brackets (males/females). Asterisks above plots indicate significant differences in gene expression (pair-wise Wilcoxon test, \* $p$ -value<0.05, \*\* $p$ -value<0.01, \*\*\* $p$ -value<0.001). The full set of statistical tests is presented in Table S6. B) Transcript abundances for genes exhibiting either activation-associated (S9 to S13) or repression-associated (S1 or S2) chromatin states in females (pink) and males (blue). Numbers in brackets indicate the number of genes in each class. Asterisks indicate significant differences (\* $p$ -value>0.05, \*\* $p$ -value<0.01, \*\*\* $p$ -value<0.001). C) GO term enrichment for genes marked with activation-associated (S9-S13) or repression-associated (S1-S2) chromatin states in males and females. D) Venn diagrams representing the proportion of genes marked with activation-associated (S9-S13) or repression-associated (S1-S2) chromatin states in males and females.

245 A GO-term enrichment analysis of genes in either activation-associated states (S9-S13) or  
246 repression-associated states (S1-S2) showed that the set of genes associated with states S9-  
247 S13 was enriched in functions such as translation, oxidation-reduction, methylation and  
248 dephosphorylation, whereas the set of genes in S1-S2 states was enriched in functions such  
249 as phosphorylation and DNA replication (Figure 2C). GO term enrichment was more stable  
250 between sexes for repression-associated chromatin states, whereas sex-specific GO term  
251 enrichment was observed for genes in the activation-associated chromatin states S9-S13  
252 (Figure 2C, Table S7) but note that a large proportion of the genes S1-S2 exhibited  
253 conservation of the repression-associated state in both males and females (82.3% of genes),  
254 whereas conservation was less marked for genes in states S9-S13 (62.5%; Figure 2D).

### 255 **Chromatin states and gene expression of *Ectocarpus* sex-biased genes**

256 To investigate the role of histone PTMs in sexual differentiation, we examined the chromatin  
257 states associated with genes that showed sex-biased expression patterns. A comparison of  
258 gene expression patterns in the two near-isogenic male and female lines (Figure S1), based on  
259 RNA-seq data generated using the same biological samples as were used for the ChIP-seq  
260 analysis, identified a total of 268 genes that exhibited sex-biased expression ( $p_{adj} < 0.05$ , fold  
261 change  $> 2$ , TPM  $> 1$ ; Table S5).

262 Presence of the activation-associated chromatin marks H3K36me3, H3K9me3, H3K27ac and  
263 H3K4me3 (states S9-S13) was associated with higher transcript abundance for sex-biased  
264 genes in both males and females but the difference was only statistically significant for males  
265 (Wilcoxon test p-values of 0.012 for males and 0.188 for females; Figure S2, S3). Sex-biased  
266 genes therefore display a similar association between the presence of activation-associated  
267 marks and increased gene expression levels as observed with the genome-wide gene set  
268 (Figure 2A).

### 269 **Chromatin states of sex-biased genes in males and females**

270 To analyse modifications of chromatin PTMs associated with differential expression of sex-  
271 biased genes, transitions between chromatin states in males and females were evaluated on  
272 a gene-by-gene basis. This analysis showed that 54.8% of male-biased genes (MBGs) and  
273 47.2% of female-biased genes (FBGs) had different chromatin states in males and females  
274 (Table S5), underlining the dynamic landscape of histone PTMs on sex-biased genes in males  
275 and females.

276 Overall, the proportions of the different chromatin states, specifically for MBGs, were  
277 significantly different compared with NEGs suggesting that their chromatin landscape is not  
278 related to their narrow expression (Chi-square test, p-value = 4.937E-15 and p-value = 0.01608

279 in FBGs vs NEGs in females and males and p-value = 5.627E-4 and p-value = 3.333E-6 for MBGs  
280 vs NEGs in females and males respectively; Figure 1C and Figure 3A).

281 For the set of male-biased genes there was a marked difference between the relative  
282 proportions of the different chromatin states in males compared to females: in males,  
283 chromatin states that included the repression-associated mark H4K20me3 were rare whereas  
284 states that included activation-associated marks (H3K9ac, H3K27ac, H3K4me3 and/or  
285 H3K36me3, but not H4K20me3) were common (Figure 3A, 3B; Table S3). The proportion  
286 represented by chromatin states that contained H4K20me3 (S2 to S8) decreased from 42.1%  
287 in females to 3.9% in males whilst the proportion represented by states S9 to S13 (activation-  
288 associated states) increased from 34% in females to 73.7% in males (Figure 3A, 3B; Table S3).  
289 Almost half (43.4%) of the male-biased genes exhibited a transition from a state that included  
290 H3K9ac, H3K27ac, H3K4me3 and/or H3K36me3, but not H4K20me3 (S9-S13) in males to a  
291 state that either included H4K20me3 (S2 to S8) or to state S1 (none of the histone PTMs  
292 detected) in females (Figure 3C; Table S9). The chromatin state transitions of male-biased  
293 genes were consistent with the correlation between the presence and absence of activation-  
294 associated and repression-associated histone PTMs and differences in the abundances of the  
295 transcripts of sex-biased genes between sexes observed for the complete set of all *Ectocarpus*  
296 genes (Figure 2A).

297 Unexpectedly however, female-biased genes exhibited a different pattern of chromatin state  
298 transitions when males and females were compared. States that included activation-  
299 associated marks (H3K9ac, H3K27ac, H3K4me3 and/or H3K36me3, i.e. states S3-S13) were  
300 slightly more frequent in females (76.3%) compared with males (69.2%), but female-biased  
301 genes were often associated with H3K20me3 (states S2-S8) in females (37.8%; Figure 3A, B;  
302 Table S3). Only 12% of the female-biased genes were associated with chromatin marks S9-S13  
303 in females and underwent a transition to a state that included H3K20me3 or to a background  
304 state in males (S1-S8) (Figure 3C; Table S9).

305 In conclusion, chromatin state transitions between sexes were concomitant with changes in  
306 expression levels of sex-biased genes between males and females. For male-biased genes, the

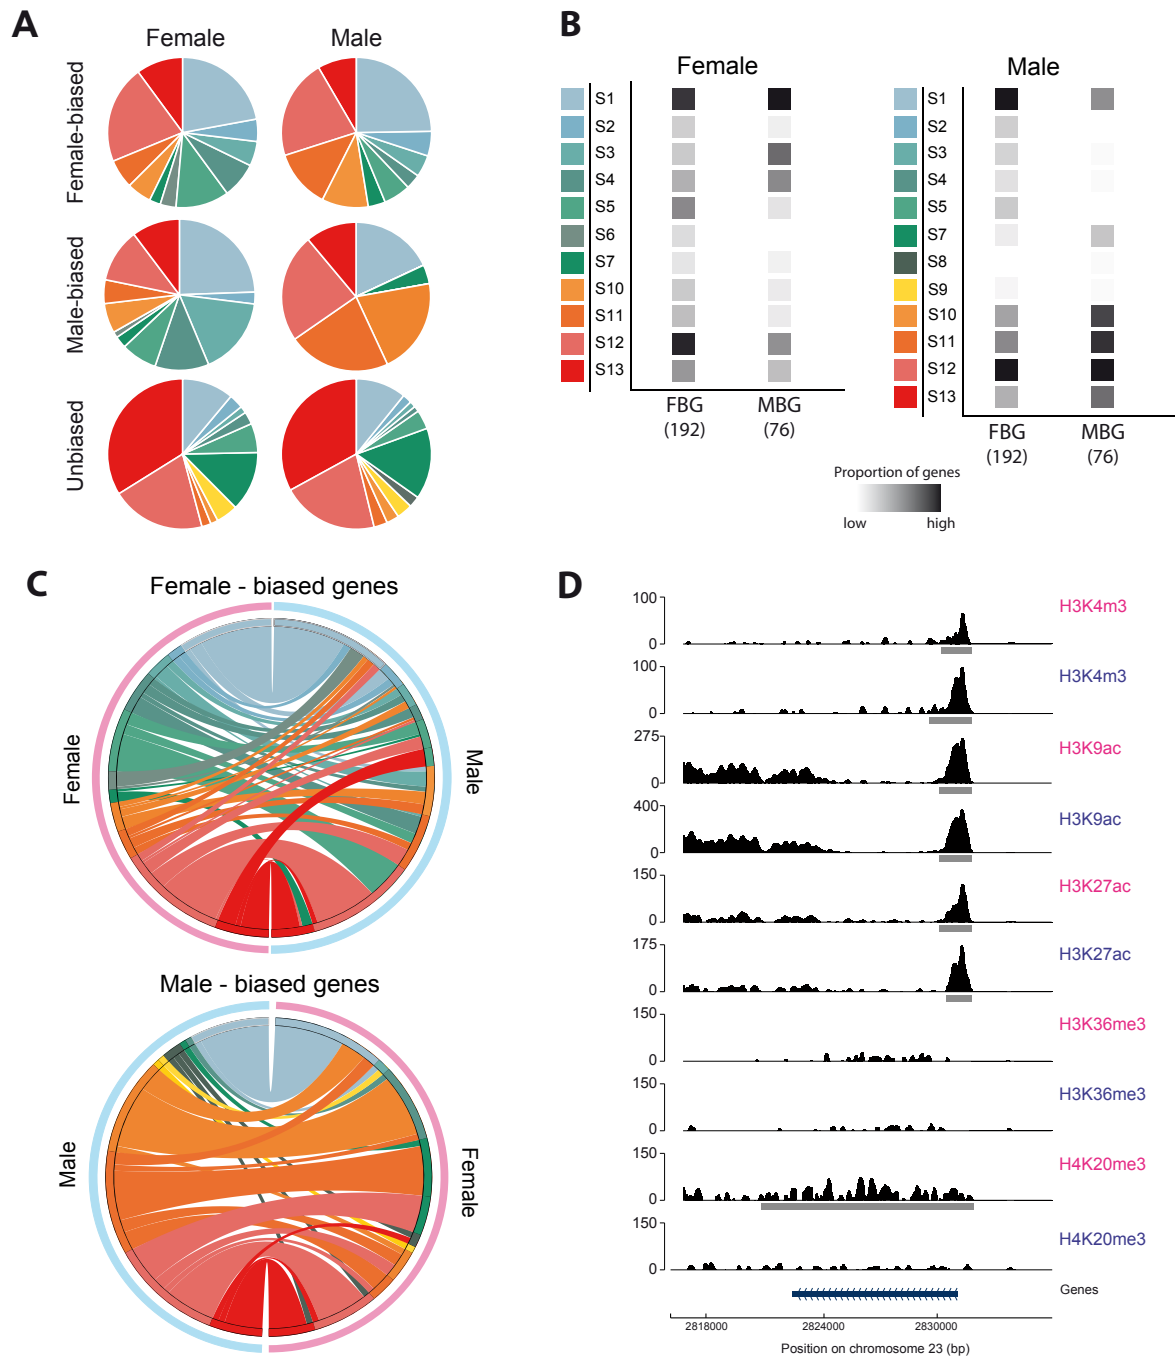

307

**Figure 3. Histone PTM patterns at sex-biased genes in *Ectocarpus* sp. males and females.** A) Proportions of the 13 chromatin states for female-biased, male-biased and unbiased genes in females (left) and males (right). B) Proportions of genes associated with each of the 13 chromatin states for female-biased and male-biased genes in females (left) and males (right). The intensity of the grey squares is proportional to the number of genes corresponding to each state. Coloured squares represent the different chromatin states (see Figure 1A). The total numbers of genes analysed for each condition is given in brackets, and the number of genes in each chromatin state are provided in Table S8. FBG: female-biased genes; MBG: male-biased genes. C) Circos plots comparing chromatin states associated with female-biased (above) and male-biased (below) genes in females (pink) and males (blue). The colour code for the chromatin states is the same as that used in Figure 1A. Each link corresponds to the transition from a state in the sex on the left to a state in the sex on the right of the circos plot. D) Representative chromatin profiles for a male-biased gene on chromosome 23 (blue bar). The histone PTMs indicated in blue and pink correspond to those of the male and the female, respectively. The horizontal grey bars under each track correspond to peaks called by either MACS2 (H3K4me3, H3K9ac and H3K27ac) or SICER (H3K36me3 and H4K20me3).

308 patterns of these state transitions were consistent with the tendencies observed for the

309 complete set of all *Ectocarpus* genes, and therefore with the associations between specific  
310 histone PTMs and either gene activation or gene repression reported for animals and land  
311 plants, as described above. Female-biased genes, however, did not conform to this pattern.

### 312 **The chromatin landscape of the *Ectocarpus* sex chromosomes**

313 In organisms with diploid sexual systems (XY or ZW), sex chromosomes exhibit different  
314 patterns of histone PTMs to autosomes (Brown and Bachtrög, 2014; Picard et al., 2019). In  
315 *Drosophila* males for example, the X chromosome is transcribed at a higher level in males than  
316 in females, due to dosage compensation of the hemizygous X, and exhibits an enrichment in  
317 active chromatin marks (Brown and Bachtrög, 2014). In contrast, in female mammals, the  
318 inactivated X chromosome is characterized by DNA methylation and widespread presence of  
319 repressive chromatin marks (Brockdorff and Turner, 2015; Lucchesi et al., 2005). In addition,  
320 Z-chromosome-localised female-specific hyperacetylation of histone H4 (H4K16Ac) has been  
321 described for the chicken (Bisoni et al., 2005) and epigenetic analysis underlined the  
322 specialized chromatin landscape of the Z-specific region of *S. mansooni*, which is more  
323 permissive than that of the autosomal regions in both male and female *S. mansooni* (Picard et  
324 al., 2019).

325 A similar marked difference between sex chromosomes and autosomes was observed in  
326 *Ectocarpus* sp. (Figure 4A, Table S5, S10; Figure S4, S5). The relative proportions of each of the  
327 13 chromatin states showed some variance between autosomes but the set of genes on the  
328 sex chromosomes exhibited strikingly different patterns to those of the autosomes (Figure  
329 4A). There was a significant dearth of genes marked with the activation-associated states S12  
330 and S13 on the sex chromosomes compared to the autosomes (permutation tests U versus  
331 autosomes,  $p\text{-value}_{S12}=0.047$  and  $p\text{-value}_{S13}=0.039$ ; permutation tests V versus autosomes,  
332  $p\text{-value}_{S12}=0.046$  and  $p\text{-value}_{S13}=0.037$ ; Table S11). Furthermore, in males, the sex  
333 chromosome was significantly enriched in states that included the histone PTM H4K20me3  
334 compared with autosomes, specifically state S2 ( $p\text{-value} = 0.025$ ), S4 ( $p\text{-value} = 0.021$ ), S5 ( $p\text{-}$   
335  $\text{value} = 0.008$ ) and S8 ( $p\text{-value} = 0.028$ ); Figure 4A-C, Table S11).

336 The significantly distinct chromatin patterns between sex chromosome and autosomes were  
337 equally manifest when only the pseudoautosomal region (PAR) was taken into account (Chi-  
338 square test  $p\text{-value} < 2.2E-16$ ; Figure 4A-C). For example, 67% and 76% of the PAR genes in  
339 males and females, respectively, were associated with chromatin states S1-S8 compared with  
340 40.1% and 41.5% in males and females, respectively, for autosomal genes (Table S5, Table  
341 S12). Although the proportions of chromatin states for the PAR in males and females were not  
342 statistically different (chi-square test with continuity correction,  $p\text{-value}=0.251$ ) there were  
343 considerably more genes with chromatin state S4 in the PAR in females (12%) than in the PAR

344 in males (4%) (Proportion test, p-value = 6.214e-06) (Table S12). Remarkably, almost half  
345 (45%) of the genes located in the PAR were found to be associated with different chromatin  
346 states in males and females (Table S5), indicating that a substantial proportion of the PAR  
347 genes display sex-dependent chromatin state transitions. Note that only 11 of the 412 PAR  
348 genes were classed as sex-biased genes (Table S5), so the sex-related changes in chromatin  
349 states of the PAR genes do not appear to be linked with sex-biased PAR gene expression.

350 Analysis of the sex-determining regions of the chromosomes showed that the majority of the  
351 genes within the female SDR (i.e., U-specific genes) were in state S1 (i.e., carried none of the  
352 assayed marks) whereas the V-specific genes were mostly in state S7 (displayed all of the  
353 assayed marks) or state S8 (H3K36me3 and H4K20me3), with some genes in state S13 (all  
354 marks except H4K20me3) (Figure 4B-C; Table S13). However, note that, due to the low number  
355 of SDR genes, it was not possible to rule out that the difference between chromatin state  
356 patterns of the male and female SDRs was due to chance (100 000 permutations tests on  
357 Pearson's  $X^2$  statistics).

358 Previous work has shown that the *Ectocarpus* PAR region is enriched in transposons compared  
359 with autosomes (Ahmed et al., 2014; Luthringer et al., 2015). Considering that in *Ectocarpus*  
360 H4K20me3 co-localizes with transposon sequences (Bourdareau et al., 2020) we asked if the  
361 presence of transposons in PAR genes could explain the observed chromatin state distribution  
362 patterns. More PAR genes contained a transposon sequence compared to autosomal genes  
363 (80% versus 36%, respectively) but there was not a correlated increase in the proportion of  
364 PAR genes marked with H4K20me3 (28-29% for the PAR versus 25-27% for autosomes) (Table  
365 S14). Moreover, permutation tests using subsets of autosomal genes in which 80% of the  
366 genes were selected to contain transposons (i.e., a similar proportion of genes with  
367 transposons to that observed for the PAR) indicated that the unusual pattern of chromatin of  
368 states in the PAR was not due simply to the presence of additional genes with inserted  
369 transposons (Table S14).

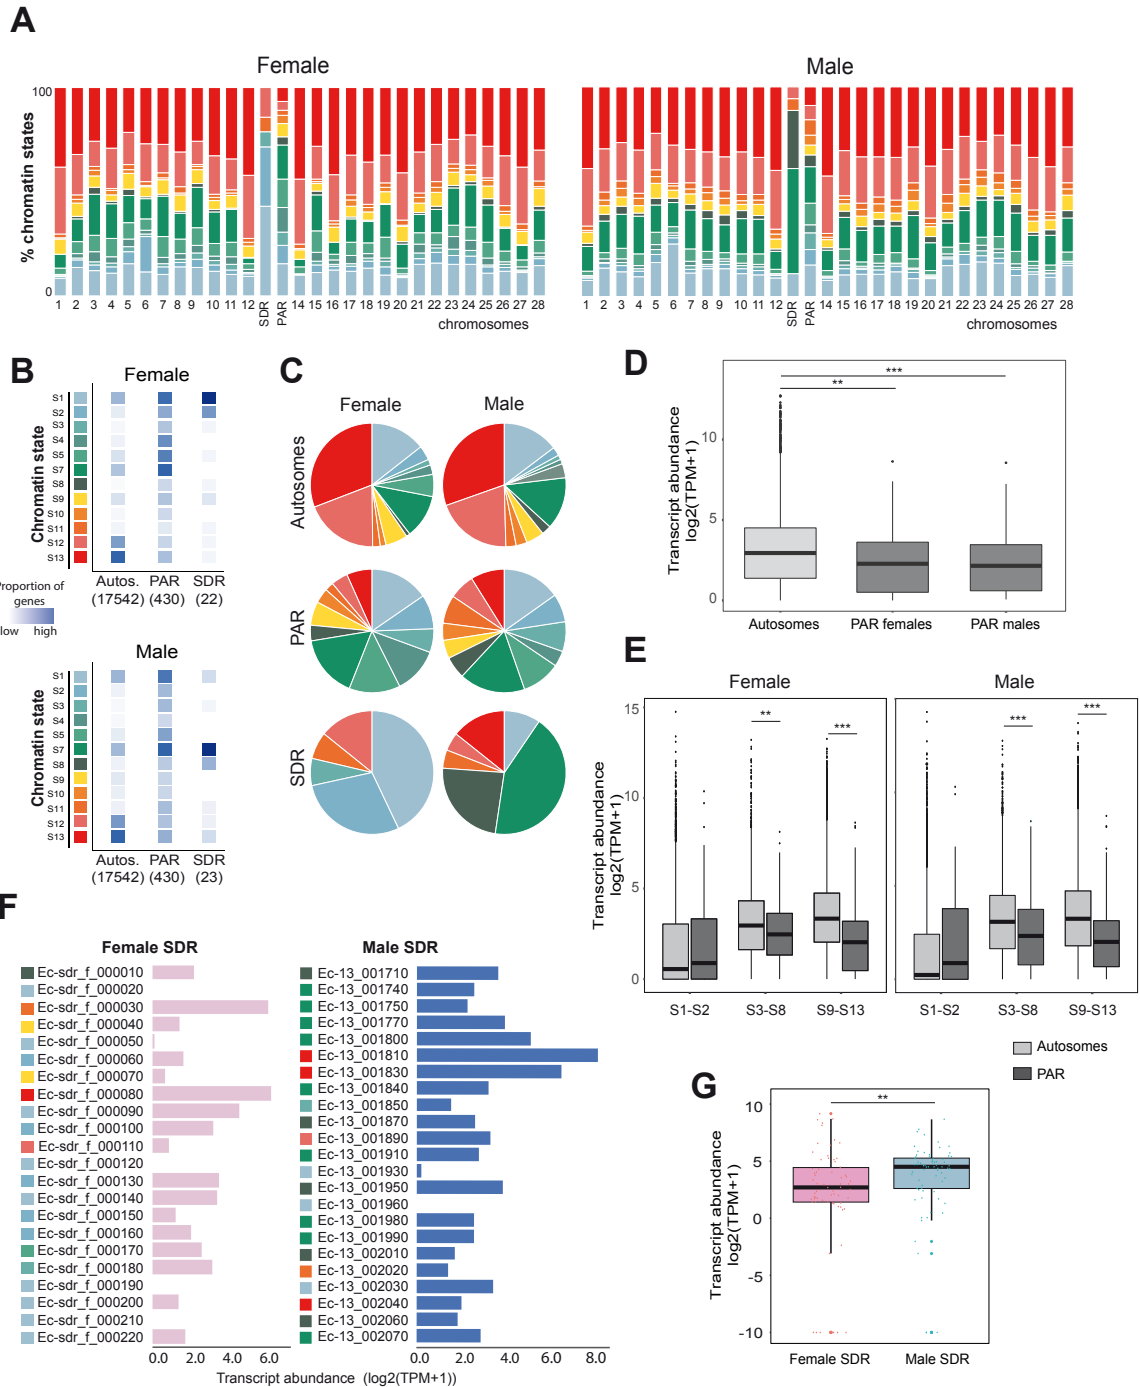

**Figure 4. Chromatin landscape of the U and V sex chromosomes compared with the autosomes.** A) Chromatin state distribution for each autosome and for the SDR and PAR regions of the sex chromosome in females (left panel) and in males (right panel). B) Proportions of genes associated with each of the 13 chromatin states for all autosomes and for the PAR and SDR regions of the sex chromosome in females (top panel) and in males (bottom panel). The intensity of the blue colour is proportional to the number of genes in each state. The total numbers of genes in each genomic region are represented in brackets. The colour code for the chromatin states is the same as that used in Figure 1A. Autos., autosomes. C) Proportions of chromatin states associated with autosomal, PAR and SDR genes in males and females. The colour code for the chromatin states is the same as in Figure 1A. D) Transcript abundances, measured as  $\log_2(\text{TPM}+1)$ , for autosomal and for PAR genes in males and females. E) Transcript abundances for autosomal and PAR genes in different chromatin states: repression-associated states S1-S2, states that include canonical activation marks and H4K20me3 (S3-S8) and activation-associated states S9-S13. Significant differences were assessed using pairwise Wilcoxon rank sum test (\*\*p-value < 0.01, \*\*\*p-value < 0.0001). F) Transcript abundances, measured as  $\log_2(\text{TPM}+1)$ , for individual genes located in the female (pink) and male (blue) sex determining regions (SDRs). Coloured squares represent chromatin states corresponding to the colour code indicated in Figure 1A (see also Table S13). G) Transcript abundances of genes located within the sex-specific regions (SDRs) of the U and V sex chromosomes. Asterisks above the plots indicate significant differences (pair-wise Wilcoxon test, \*\*p-value < 0.01).

370 Overall, transcript abundances of genes located in the PAR were significantly lower than those

371 located in autosomes (Wilcoxon p-value=0.003 and p-value=0.0005 for female and male  
372 respectively; Table S4, Figure 4D). Potentially, this difference in expression level may also have  
373 explained the difference between the chromatin state patterns of the PAR and the autosomes.  
374 To test this hypothesis, we selected a subset of autosomal genes that had a similar pattern of  
375 transcript abundances to that of the PAR genes (Table S15). The distribution of chromatin  
376 states for this set of autosomal genes was different to that of the PAR genes (Figure S6,  
377 indicating that gene expression level was not the cause of the difference in chromatin state  
378 patterns between the PAR genes and the autosomes.

379 The lower transcript abundance for PAR genes was consistent with the higher proportion of  
380 genes in repressive-associated states (S1-S2) compared with autosomal genes (24% for the  
381 PAR compared with 13% for the autosomes), but note that even PAR genes in activation-  
382 associated states (S9-S13) exhibited significantly lower expression levels than autosomal  
383 genes in similar states (pairwise Wilcoxon test, p-value=7.1E-9, p-value=7.1E-9 for female and  
384 male respectively; Figure 4E).

### 385 **Chromatin states and expression levels of sex chromosome genes**

386 Gene expression levels and deposition of chromatin marks were highly correlated for the  
387 complete set of *Ectocarpus* genes (see above, Figure 2A). For example, genes in state S13  
388 (presence of all four activation-associated marks) had a significantly higher expression level  
389 compared with genes in state S7 (presence of all four activation-associated marks plus  
390 H4K20me3). In females, when the correlations between chromatin states and levels of gene  
391 expression were compared for the autosomes and for the PAR, three chromatin states (S7,  
392 S12 and S13) exhibited a significantly weaker correlation with expression for the latter  
393 compared with the former. In males, weaker correlation between chromatin state and  
394 expression level was also observed for the PAR compared to the autosomes but only for states  
395 S7 and S13 (Table S16, Figure S7). In other words, depending on the location (PAR or  
396 autosomes) the correlation between chromatin state and gene expression level was not the  
397 same.

398 There was no significant correlation between levels of expression of either male or female SDR  
399 genes and the presence of particular chromatin marks (likelihood ratio tests, p-value = 0.460  
400 and p-value = 0.304 for female and male SDR, respectively; Figure 4F), but the small sample  
401 size of SDR genes decreases the power of the statistical test. Note however that H3K36me3,  
402 a mark associated with transcript elongation (Huang and Zhu, 2018), was more often present  
403 at male SDR genes (in 18/23 genes) than at female SDR genes (1/22 genes)(Figure 4, Figure  
404 S4, Table S5) and we also noticed that abundances of transcripts for male SDR genes were



405 significantly higher than for female SDR genes (Figure 4G; pairwise Wilcoxon test with Holm  
406 correction, p-value=0.0098).

407 Taken together, these observations suggest that the sex chromosome exhibits exceptional  
408 features in terms of its chromatin landscape. The unique features of the PAR are not explained  
409 by the preponderance of intragenic transposons nor by the fact that genes in this region have  
410 a lower mean level of gene expression. The relationship between chromatin state and gene  
411 expression level for the sex chromosomes is different to that observed for the autosomes.

## 412 Discussion

### 413 Epigenetic regulation in a haploid UV sexual system

414 Three types of genetic sex determination system exist in nature: XX/XY, ZZ/ZW systems and  
415 U/V systems (Bachtrog et al., 2014; Coelho et al., 2018). Studies have focused on  
416 understanding sex determination and sex biased gene expression but we know little about  
417 chromatin dynamics in males compared to females. The objective of this study was to provide  
418 an overview of the sex differences in the chromatin landscape in a haploid UV system, and to  
419 investigate the relationship between chromatin states and gene expression differences  
420 between sexes and genomic regions, with a particular emphasis on the U and V sex  
421 chromosomes.

422 We analysed the genome-wide distribution of five histone PTMs in males and females of an  
423 organism with haploid UV sex determination, resulting in the definition of 13 chromatin states  
424 corresponding to different combinations of the five histone PTMs. Chromatin states that  
425 included different combinations of H3K4me3, H3K9ac, H3K27ac and H3K36me3 were  
426 associated with actively transcribed genes, whereas chromatin states that included  
427 H4K20me3 were associated with a decrease in gene expression compared to equivalent states  
428 that lacked H4K20me3. States that included H3K36me3 were associated with broadly  
429 expressed genes, and this mark was less prevalent on genes with narrow expression patterns,  
430 a configuration that is compatible with the idea that H3K36me3 is deposited during  
431 transcription elongation (Barski et al., 2007). Note that the difference in H3K36me3 levels in  
432 NEGs versus housekeeping genes could be related to the lower power to detect H3K36me3  
433 binding of tissue-specific genes expressed only in a subset of cells. It was interesting however  
434 that the difference between the housekeeping and NEG gene sets was considerably more  
435 marked for H3K36me3 than for the TSS-located PTM (Table S4), perhaps indicating a stronger  
436 link with gene transcription. A similar association of H3K36me3 with broadly expressed genes  
437 has been described for *Drosophila* (Brown and Bachtrog, 2014; Filion et al., 2010), indicating  
438 that this correlation has been conserved across distantly related lineages. Overall, the

439 *Ectocarpus* chromatin patterns described here are consistent with H3K4me3, H3K9ac,  
440 H3K27ac and H3K36me3 having similar roles in brown algae, land plants and animals (Baroux  
441 et al., 2011; Bourdareau et al., 2020; Margueron and Reinberg, 2010; She and Baroux, 2015).  
442 The role of H4K20me3, in contrast, appears to be less conserved across eukaryotic  
443 supergroups, being associated with low transcriptional levels in both animals and brown algae  
444 but with euchromatin and transcriptional activation in land plants (de la Paz Sanchez and  
445 Gutierrez, 2009; Fischer et al., 2006).

446 Our analysis has also identified some novel features of the relationship between chromatin  
447 marks and gene expression in *Ectocarpus*. For example, we identified a positive correlation  
448 between the number of different activation-associated marks (TSS marks and H3K36me3) that  
449 were deposited at a gene and transcript abundance. In the absence of canonical repressive  
450 marks such as H3K27me3 in *Ectocarpus* (Bourdareau et al., 2020), it is possible that chromatin  
451 regulation of gene expression in *Ectocarpus* may be dominated by the synergistic action of  
452 activation marks (although it is important to bear in mind the possibility that the activation-  
453 associated marks may be deposited a consequence of transcription rather than mediating  
454 gene activation). Deposition of H4K20me3 was consistently associated with decreased  
455 transcript abundance in *Ectocarpus*, and in that respect this mark can be considered to be  
456 'repression-associated'. However, it is currently unclear if H4K20me3 action is direct or  
457 indirect through silencing of intronic transposons (Bourdareau et al., 2020).

#### 458 **Relationship between H4K20me3 and gene expression**

459 A complex relationship was observed between H4K20me3 and gene expression. There was  
460 clear evidence for a correlation between H4K20me3 and gene expression levels that was  
461 independent of the TSS-localised marks and H4K36me3 (Figure 2A). A previous study found  
462 that genes marked with H4K20me3 exhibited significantly weaker signals for TSS-localised  
463 PTMs (H3K4me2, H3K4me3, H3K9ac, H3K14ac and H3K27ac) (Bourdareau et al., 2020),  
464 suggesting a possible effect of H4K20me3 on gene expression via TSS marks. Taken together,  
465 these observations suggest that H4K20me3 may act on gene expression via two different  
466 pathways, one via an effect on TSS marks and the other by acting directly on gene expression,  
467 independently of the TSS marks. However, an alternative hypothesis would be that increased  
468 gene expression leads to a decrease in H4K20me3. In other words, activation of a gene might  
469 involve (in addition to other processes) suppression of heterochromatin-associated marks  
470 such as H4K20me3 leading to a tendency for H4K20me3 to be present at loci that are less  
471 marked with TSS-located PTMs.

#### 472 **Chromatin dynamics of *Ectocarpus* sex-biased genes in males and females**

473 Genome-wide, the proportions of genes associated with each chromatin state did not differ  
474 substantially when males were compared with females. However, when individual genes were  
475 compared, a considerable fraction was associated with different chromatin states in the two  
476 sexes, including genes that did not exhibit sex-biased expression patterns. It is possible that  
477 the differences correspond to chromatin state ‘noise’, in which case they would not be  
478 expected to be linked with sex-biased gene expression. However, the strong correlation  
479 between chromatin states and expression levels argues for a biological role for chromatin  
480 state changes. One hypothesis would be that genes display sex-specific chromatin  
481 configurations prior to the appearance of significant sex differences in gene expression and  
482 phenotypic differentiation. In other words, differences in chromatin state may anticipate sex-  
483 biased differences in gene expression at later stages, as has been reported for mammalian  
484 fetal germ cells (Lesch and Page, 2013). A more refined study using several stages of  
485 development of male and female gametophytes would be needed to gain further insights into  
486 this matter.

487 In males, most of the male-biased genes were marked with activation-associated chromatin  
488 states (S9-S13), whereas in females, male-biased genes were predominantly marked with  
489 repression-associated chromatin states (S1-S2). This observation is consistent with gene  
490 expression level modifications reported for sex-biased genes in males compared with females,  
491 where male-biased expression is due to a combination of both upregulation in males (i.e.,  
492 activation of male-biased genes in males) and decreased expression in females (i.e., repression  
493 of male-biased genes in females) (Lipinska et al., 2015). However, more than half of the FBGs  
494 were marked with activation-associated chromatin states (S9-S13) in males, whereas in  
495 females, FBGs were predominantly marked with chromatin states that included H4K20me3. It  
496 appears therefore that female-biased genes do not follow the same trends that were observed  
497 genome-wide and for MBGs, where TSS marks were clearly associated with gene activation  
498 and H4H20me3 associated with lower transcript abundances.

#### 499 **Unique chromatin organisation features in the U and V sex chromosomes**

500 In organisms with UV sexual systems, the U and V sex-specific regions are both non-  
501 recombining, exhibit relatively similar structural features and appear to have been subjected  
502 to similar evolutionary pressures (Ahmed et al., 2014; Mignerot and Coelho, 2016). Despite  
503 these similarities, the genes in the male SDR exhibited a different pattern of chromatin states  
504 to the genes in the female SDR. In particular, H3K36me3, a mark that is often involved in  
505 dosage compensation and is usually enriched on X chromosomes (Bell et al., 2008), was  
506 detected on 18/23 (78%) of the male SDR genes but only in 6% (1/16) female SDR genes, but  
507 note that statistical analysis showed no significant differences between U and V SDRs due to

508 the low number of genes in this region. Deposition of H3K36me3 is associated with increased  
509 transcript abundances in plants and animals (Roudier et al., 2011; Shilatifard, 2006), and we  
510 found that genes on the *Ectocarpus* male SDR exhibited significantly higher expression levels  
511 than female SDR genes (Figure 4G).

512 The *Ectocarpus* PAR has been shown to have unusual structural and gene expression features  
513 compared to the autosomes (Avia et al., 2018; Luthringer et al., 2015) and this study found  
514 unusual patterns of chromatin states in this genomic region. However, the analysis also  
515 showed that neither the levels of gene expression, which are lower, on average, for the PAR  
516 compared with autosomes, nor the greater prevalence of transposons and repeat sequences  
517 in PAR genes explained the unusual patterns of chromatin states. Moreover, sex-specific  
518 differences in chromatin states were prominent on the PAR of the U and V sex chromosomes,  
519 where almost half (47%) of the genes displayed different chromatin states between the two  
520 sexes. Our observations emphasise the unique features of the PAR of the *Ectocarpus* UV sex  
521 chromosomes, and suggest that the effect of chromatin states on transcript abundance may  
522 depend on the genomic locations of genes, and that the same chromatin states do not  
523 correspond to the same level of transcriptional change in genes located in autosomes and sex  
524 chromosomes. It is possible that the expression of genes on the U and V sex chromosomes is  
525 regulated by different epigenetic processes to those that regulate the expression of autosomal  
526 genes, perhaps involving histone PTMs that have not been assayed in this study. Further  
527 investigations employing additional histone PTMs marks will be needed to further understand  
528 the extraordinary features of these chromosomes.

## 529 **Methods**

### 530 **Biological Material**

531 The near-isogenic male (Ec457) and female (Ec460) *Ectocarpus* sp. lines (Table S1) were  
532 generated by crossing brother and sister gametophytes for either four or five generations,  
533 respectively (Ahmed et al., 2014). The resulting male and female strains, therefore, had  
534 essentially identical genetic backgrounds apart from the non-recombining SDR. Male and  
535 female gametophytes were cultured until near-maturity for 13 days as previously described  
536 (Coelho et al., 2012) at 13°C in autoclaved natural sea water supplemented with 300 µl/L  
537 Provasoli solution (PES), with a light:dark cycle of 12:12 h ( $20 \mu\text{mol photons}\cdot\text{m}^{-2}\cdot\text{s}^{-1}$ ) using  
538 daylight-type fluorescent tubes. All manipulations were performed in a laminar flow hood  
539 under sterile conditions.

### 540 **Comparisons of male and female transcriptomes using RNA-seq**

541 RNA for transcriptome analysis was extracted from the same duplicate male and female  
542 cultures as were used for the CHIP-seq analysis. For each sex, total RNA was extracted from a  
543 mix of 90 gametophytes each, using the Qiagen Mini kit (<http://www.qiagen.com>). RNA  
544 quality and quantity were assessed using an Agilent 2100 bioanalyzer, associated with  
545 Qubit2.0 Fluorometer using the Qubit RNA BR assay kit (Invitrogen, Life Technologies,  
546 Carlsbad, CA, USA), as described previously (Lipinska et al., 2015, 2017).

547 For each replicate sample, cDNA was synthesized using an oligo-dT primer. The cDNA was  
548 fragmented, cloned, and sequenced by Fasteris (CH-1228 Plan-les-Ouates, Switzerland) using  
549 an Illumina HiSeq 4000 set to generate 150-bp single-end reads. See Table S1 for RNA-seq  
550 accession numbers.

551 Data quality was assessed using FastQC  
552 (<http://www.bioinformatics.babraham.ac.uk/projects/fastqc>; accessed May 2019). Reads  
553 were trimmed and filtered using Cutadapt (Martin, 2011) with a quality threshold of 33  
554 (quality-cutoff) and a minimal size of 30 bp.

555 Filtered reads were mapped to version v2 of the *Ectocarpus* sp. genome (Cormier et al., 2017a)  
556 using TopHat2 with the Bowtie2 aligner (Kim et al., 2013). More than 85% of the sequencing  
557 reads from each library could be mapped to the genome (Table S1).

558 The mapped sequencing data were then processed with featureCounts (Liao et al., 2014) to  
559 obtain counts for sequencing reads mapped to genes. Gene expression levels were  
560 represented as transcripts per million (TPMs). Genes with expression values below the fifth  
561 percentile of all TPM values calculated per sample were considered not to be expressed and  
562 were removed from the analysis. This resulted in a total of 18,462 genes that were considered  
563 to be expressed.

564 Differential expression analysis was performed with the DESeq2 package (Bioconductor) (Love  
565 et al., 2014). Genes were considered to be male-biased or female-biased if they exhibited at  
566 least a twofold difference (fold change; FC) in expression between sexes with a false discovery  
567 rate (FDR) < 0.05. A list of the sex-biased genes can be found in Table S5.

568 To calculate breadth of expression we employed the tissue-specificity index tau (Yanai et al.,  
569 2005) using published expression data from nine tissues or stages of the life cycle (female and  
570 male immature and mature gametophytes, mixed male and female gametophytes, partheno-  
571 sporophytes, upright partheno-sporophyte filaments, basal partheno-sporophyte filaments,  
572 diploid sporophytes) from *Ectocarpus* sp. (Cormier et al., 2017a; Lipinska et al., 2015, 2019,  
573 2017; Luthringer et al., 2015). This allowed us to define broadly expressed (housekeeping)  
574 genes (with  $\tau < 0.25$ ) and narrowly expressed genes ( $\tau > 0.75$ ).

## 575 **Genome-wide detection of histone PTMs**

576 Male versus female *Ectocarpus* sp. gametophyte ChIP-seq experiments were carried for  
577 H3K4me3, H3K9ac, H3K27ac, H3K36me3, H4K20me3, and three controls (an input control  
578 corresponding to sonicated DNA, histone H3 and immunoglobulin G monoclonal rabbit (IgG))  
579 as in (Bourdareau, 2018). RNA-seq data (see above) was generated from the same samples,  
580 to ensure that the histone PTM and gene expression data were fully compatible. For ChIP-seq,  
581 2.8 g (corresponding to 2800 individual gametophytes) of *Ectocarpus* tissue was fixed for five  
582 minutes in seawater containing 1% formaldehyde and the formaldehyde eliminated by rapid  
583 filtering followed by incubation in PBS containing 400 mM glycine. Nuclei were isolated by  
584 grinding in liquid nitrogen and in a Tenbroeck Potter in nuclei isolation buffer (0.1% triton X-  
585 100, 125 mM sorbitol, 20 mM potassium citrate, 30 mM MgCl<sub>2</sub>, 5 mM EDTA, 5 mM β-  
586 mercaptoethanol, 55 mM HEPES at pH 7.5 with complete ULTRA protease inhibitors), filtering  
587 through Miracloth and then washing the precipitated nuclei in nuclei isolation buffer with and  
588 then without triton X-100. Chromatin was fragmented by sonicating the purified nuclei in  
589 nuclei lysis buffer (10 mM EDTA, 1% SDS, 50 mM Tris-HCl at pH 8 with cComplete ULTRA  
590 protease inhibitors) in a Covaris M220 Focused-ultrasonicator (duty 25%, peak power 75,  
591 cycles/burst 200, duration 900 seconds at 6°C). The chromatin was incubated with an anti-  
592 histone PTM antibody (anti-H4K20me3, anti-H3K4me3, and anti-H3K9ac, Cell Signal  
593 Technology; anti-H3K27ac, Millipore; anti-H3K36me3, Abcam) overnight at 4°C and the  
594 immunoprecipitation carried out using Dynabeads protein A and Dynabeads protein G.  
595 Following immunoprecipitation and washing, a reverse cross-linking step was carried out by  
596 incubating for at least six hours at 65°C in 200 mM NaCl and the samples were then digested  
597 with Proteinase K and RNase A. Purified DNA was analysed on an Illumina HiSeq 4000 platform  
598 with a single-end sequencing primer over 50 cycles. At least 20 million reads were generated  
599 for each immunoprecipitation. The ChIP-seq dataset has been deposited in the NCBI Gene  
600 Expression Omnibus database under the accession numbers described in Table S2.

601 Quality control of the sequence data was carried out using FastQC (Andrews, 2016). Poor  
602 quality sequences were removed and the high quality sequences trimmed with Cutadapt  
603 (Hansen et al., 2016; Martin, 2011). Illumina reads were mapped onto the *Ectocarpus* genome  
604 (Cormier et al., 2017b) using Bowtie (Langmead et al., 2009). Duplicates were removed using  
605 samtools markdup in the Samtools package (v 1.9) (Li et al., 2009).

606 Quality control of ChIP-seq data sets followed the Encode ChIP-seq guidelines and practices  
607 (Landt et al., 2012)(Table S2). ChIP-seq analysis was carried out for two biological replicates  
608 for each PTM in both the male and female samples. Pearson correlation analysis of replicates  
609 was performed with multiBamSummary and then by plotCorrelation (v3.1.2 deepTools)

610 (Ramirez et al., 2014). Replicate samples were strongly correlated (Pearson correlations >0.92,  
611 Figure S8).

612 To identify peaks and regions of chromatin mark enrichment, each data set, after combining  
613 data for biological replicates, was analysed separately for the male and female gametophyte.  
614 Peaks corresponding to regions enriched in H3K4me3, H3K9ac and H3K27ac were identified  
615 using the MACS2 (version 2.1.1) callpeak module (minimum FDR of 0.01) and refined with the  
616 MACS2 bdgpeakcall and bdgbroadcall modules (Zhang et al., 2008). H3K36me3 and  
617 H4K20me3 were analysed using SICER (v1.1) (minimum FDR of 0.01) (Xu et al., 2014; Zang et  
618 al., 2009) with a window size of 200 bp and a gap size of 400 bp. Note that peaks associated  
619 with sex-biased, PAR and SDR genes were manually inspected to validate reproducibility  
620 between replicates. The signal was normalized using the Signal Extraction Scaling (SES)  
621 method (Diaz et al., 2012).

622 Heatmaps, average tag graphs and coverage tracks were plotted using EaSeq (Lerdrup et al.,  
623 2016). Circos graphs were generated using Circos software (Krzywinski et al., 2009).

#### 624 **Detection of chromatin states**

625 To identify the patterns of histone PTM marks associated with each gene (i.e., chromatin  
626 states), we used bedtools intersect (intersectBed) from the Bedtools software (v2.26)(Quinlan  
627 and Hall, 2010). A total of 13 combinations of histone PTM marks (S1 to S13) were detected.  
628 Note that only chromatin states that were present in more than 1% of the genes were taken  
629 in consideration for the analysis.

#### 630 **Coverage for each chromatin state**

631 The coverage for each histone PTM per chromosome was calculated using bedtools coverage  
632 where the coverage of each PTM was normalized by the size of the chromosome. The  
633 pseudoautosomal regions (PAR) and the sex-specific, non-recombining regions (SDR) of the  
634 sex chromosome were analysed separately, as in (Brown and Bachtrog, 2014).

#### 635 **Statistical analysis**

636 To test for significant differences in the conservation of chromatin states between sex-biased  
637 and unbiased genes, we used mixed generalised linear models with a binomial distribution,  
638 modelling conserved vs non-conserved states as a function of bias. We then performed a  
639 likelihood ratio test with a null model to assess the significance of bias. Statistical analysis was  
640 performed in R 3.6.3. Permutation tests were performed to study the differences of  
641 proportions of chromatin states in PAR and SDR genes compared to autosomal genes. We  
642 randomly subsampled 100,000 times a number of chromatin states equal to the number of

643 PAR genes, SDR genes or both, from autosomal genes in order to perform proportion tests.  
644 We compared observed and simulated Pearson's chi-square statistics to assess whether the  
645 observed differences in chromatin state proportions between gene sets (autosomal, SDR, PAR,  
646 SDR+PAR) were statistically due to chance. A significant p-value indicates that the observed  
647 difference in proportion are not due to chance. In order to eliminate any possible effect of TE  
648 prevalence (which is different between PAR, SDR and autosomal genes) we also performed  
649 these tests using a randomized set of autosomal genes that displayed exact the same TE  
650 prevalence.

#### 651 **GO-term analysis**

652 Gene set enrichment analysis (GSEA) was carried out separately for each sex and each histone  
653 state, using Fisher's exact Test implemented in the R package TopGO using the weight01  
654 algorithm to account for GO topology (Alexa and Rahnenfuhrer, 2020) We investigated  
655 enrichment in terms of molecular function ontology and report significant GO-terms with p-  
656 value < 0.01.

657



658 Supplemental Figures

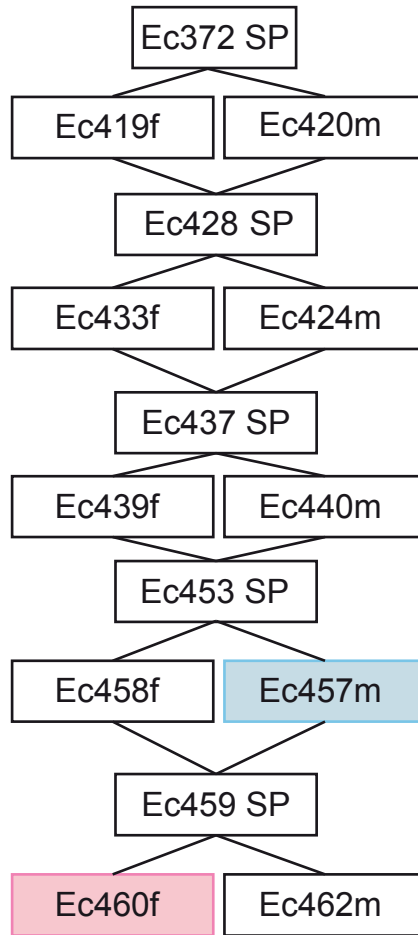

Figure S1. Pedigree of the male and female strains used in this study. SP, sporophyte; m, male gametophyte; f, female gametophyte.

659

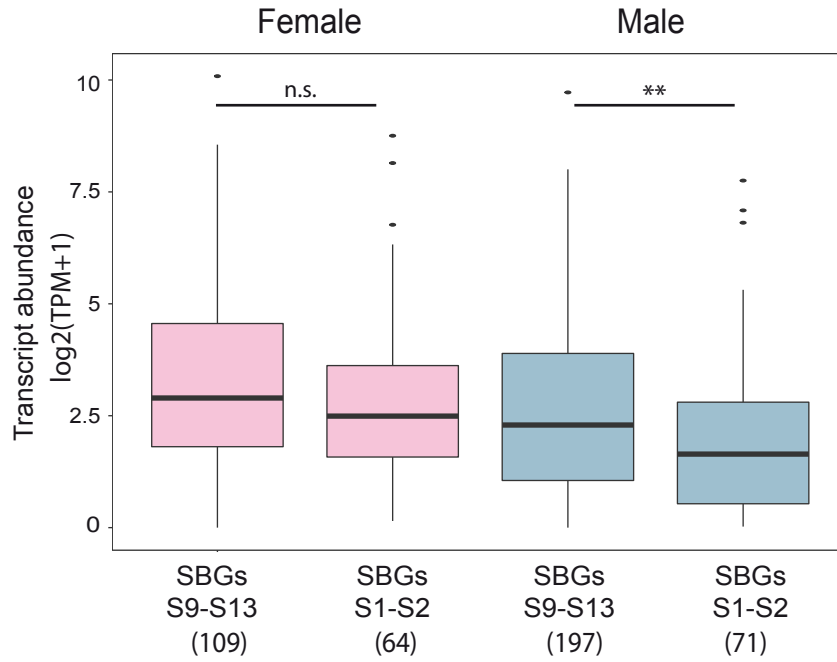

**Figure S2. Abundances of the transcripts of sex-biased genes (SBG) marked with different chromatin states in females and males.** Abundances of transcripts of SBGs in chromatin states S9-S13 or S1-S2 in females (pink) and males (blue). Values in brackets indicate the number of genes analysed. Asterisks above the plots indicate significant differences (pair-wise Wilcoxon test, \*\*p-value<0.01).

660

661

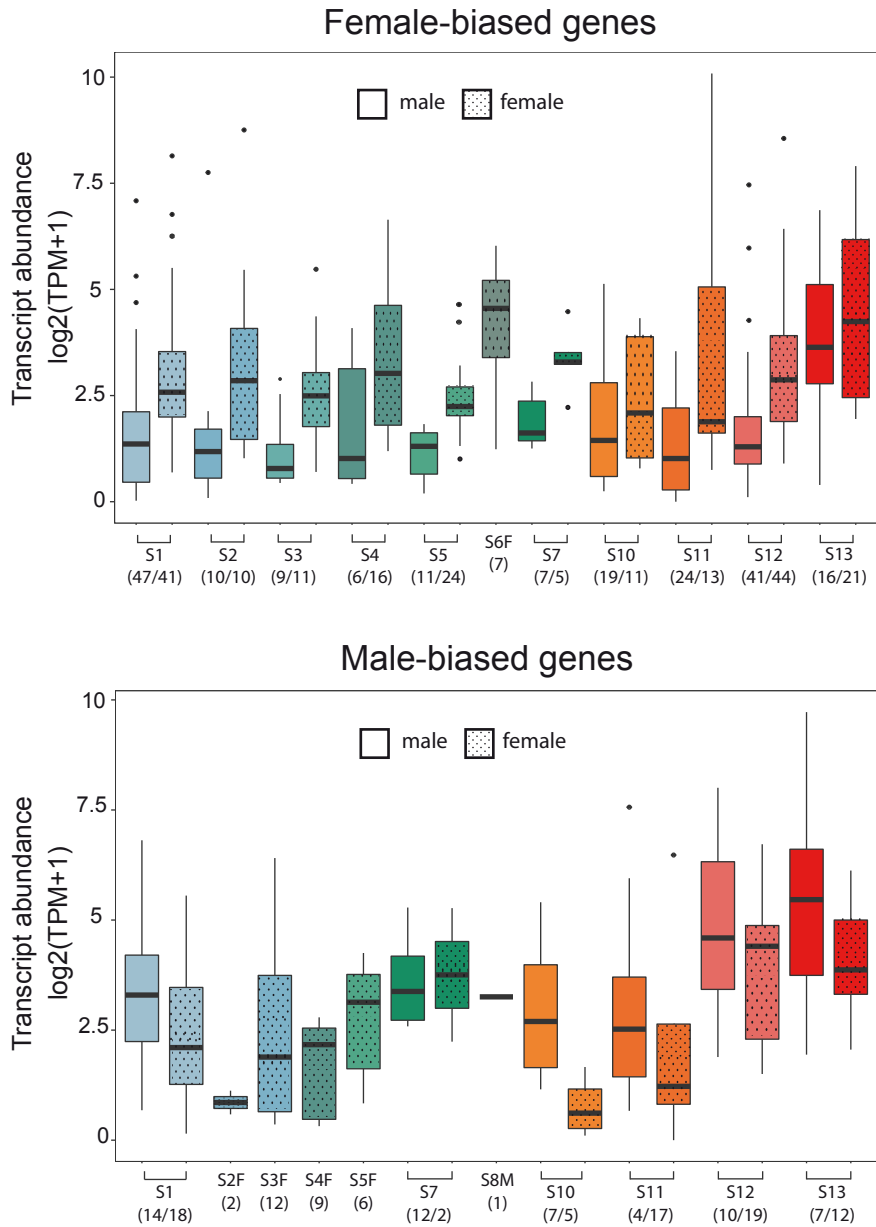

**Figure S3. Abundances of transcripts of SBGs associated with each of the different chromatin states in males and females.** The colour code is the same as that used in Figure 1A. The total number of SBGs associated with each state are indicated in brackets.

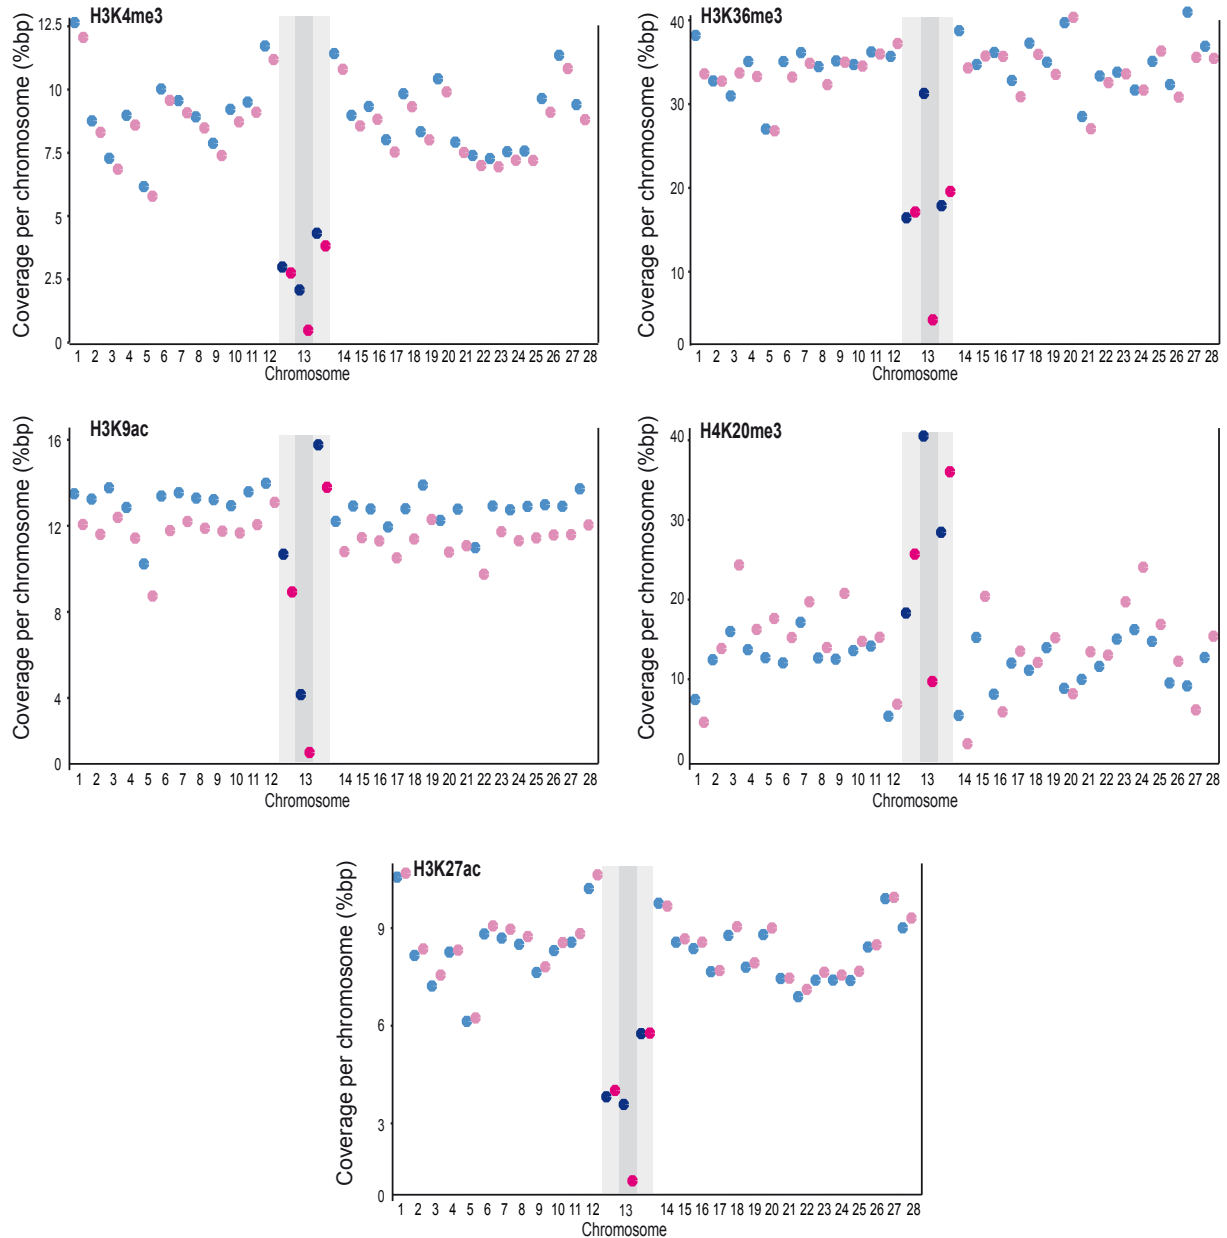

**Figure S4. Percentage of coverage for specific histone PTMs for the SDRs, PAR and autosomes in male and females.** Scatter plot showing the percent of coverage (in base pairs) for each of the five histone PTMs, H3K4me3, H3K9ac, H3K27ac, H3K36me3 and H4K20me3. Light blue and light pink represent coverage in male and female, respectively. Dark blue and red dots correspond to coverage for the V and U sex chromosomes, respectively. Light shading indicates the two PARs and dark shading the non-recombining, sex specific region (SDR) of the sex chromosome (chromosome 13).

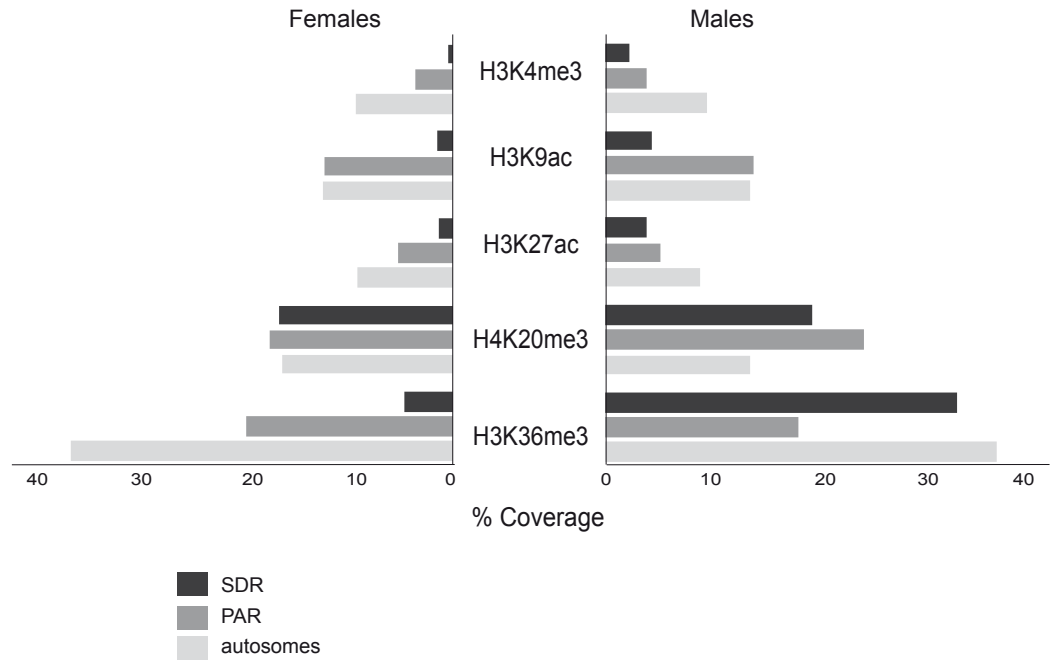

**Figure S5.** Coverage (represented as percentage of base pairs) in three different genomic regions (PAR, SDR and autosomes) marked with different histone PTMs in females (left) and males (right).

663

664

665

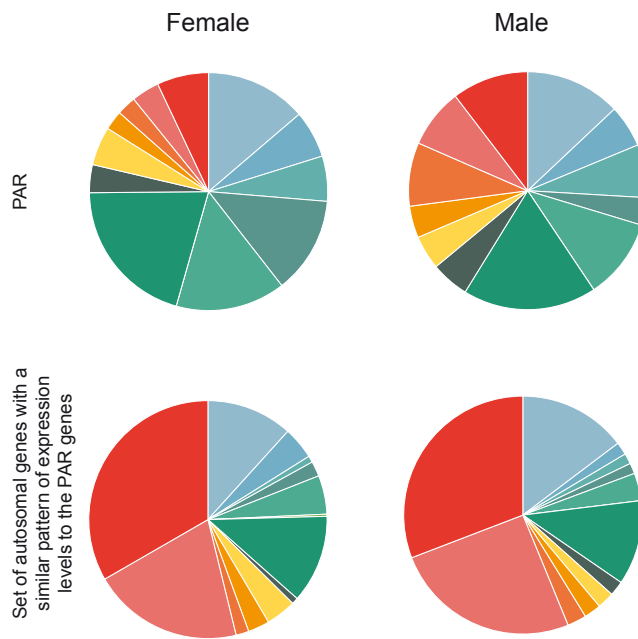

**Figure S6. Proportions of chromatin states for PAR genes compared with the proportions of chromatin states for a set of autosomal genes with a similar pattern of expression levels to the PAR genes.**

666

667

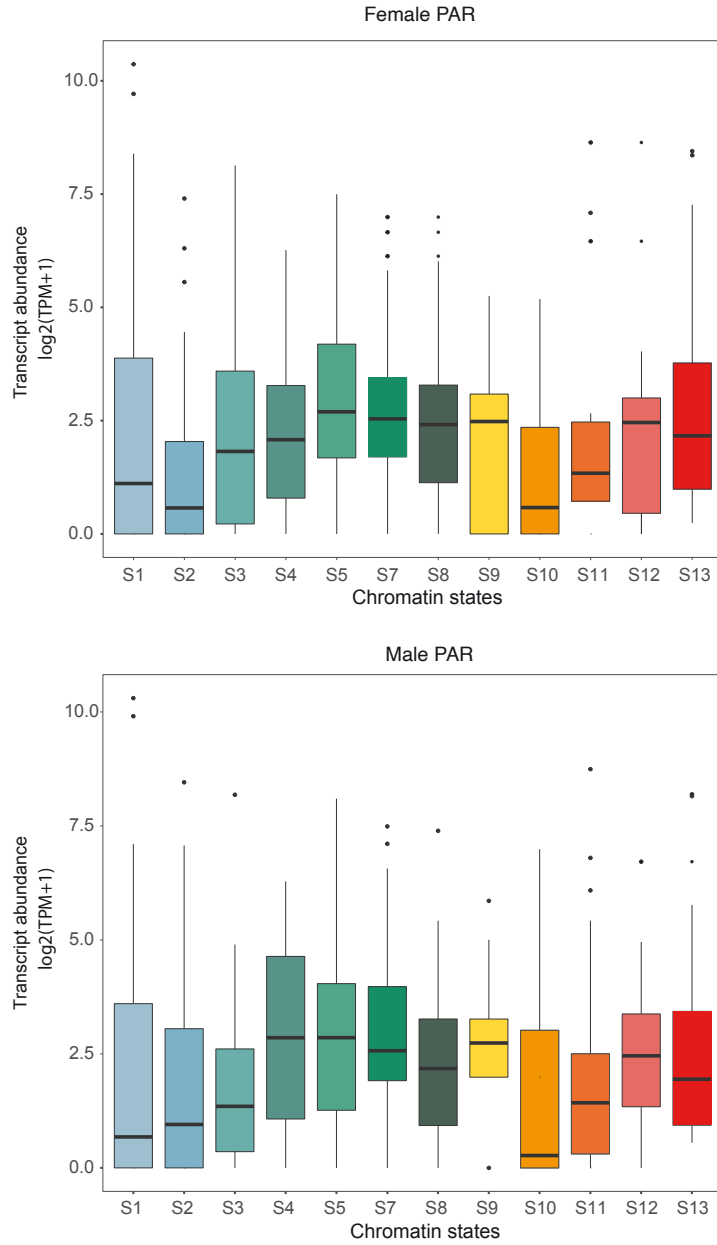

**Figure S7. Transcript abundances, measured as  $\log_2(\text{TPM}+1)$ , for PAR genes associated with different chromatin states in males and females. The colour code is the same as that used in Figure 1A.**

668

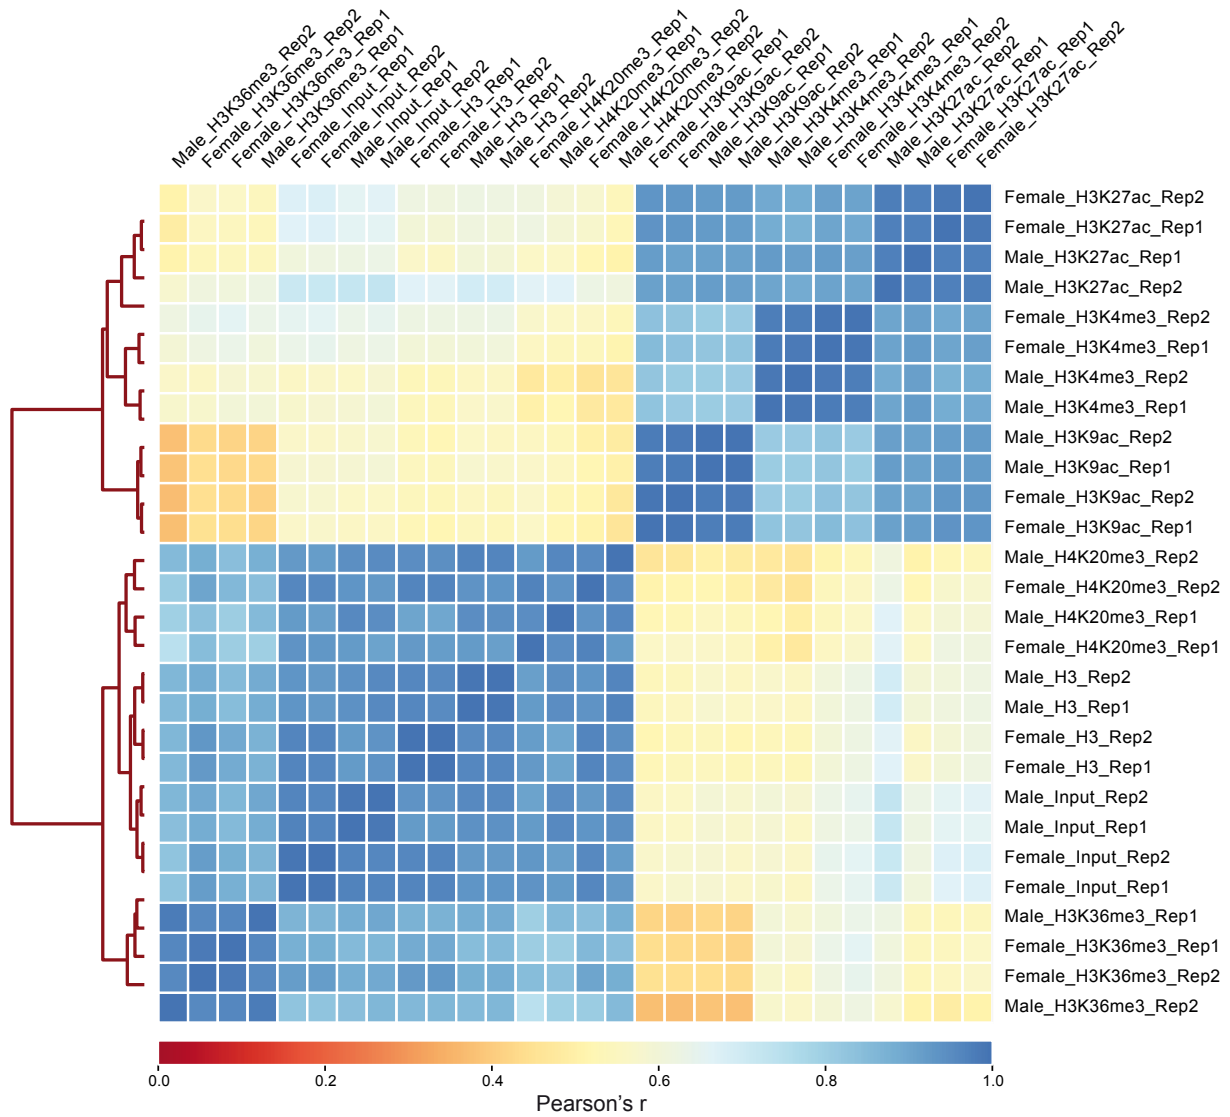

**Figure S8. Pearson correlation scores for comparisons of the genomic distributions of ChIP-seq signal peaks for the five histone PTMs.**  
Rep1, replicate 1; Rep2, replicate 2.

669

670



## 671 [Supplemental Tables Legends](#)

672 **Table S1. *Ectocarpus* strains used, RNA-seq sequencing statistics and SRA accession**  
673 **numbers.**

674 **Table S2. Sequencing statistics for the CHIP-seq analysis and GEO reference for the dataset.**  
675 N. peaks, number of peaks; FRiP, fraction of reads in peaks.

676 **Table S3. Percentages of genes associated with each of the 13 chromatin states for different**  
677 **gene sets in males and females.** Global, all genes in the genome; Transcribed genes, genes  
678 with TPM >5th percentile; Silent genes, genes with TPM <5th percentile; Housekeeping and  
679 Narrowly-expressed, genes with tau <0.75 and tau >0.75, respectively; Unbiased, no sex-  
680 biased expression. For the chromatin states, refer to Figure 1A.

681 **Table S4. Percentages of narrowly expressed genes (NEG) and housekeeping (broadly**  
682 **expressed) genes marked with different histone PTMs in males and females.**

683 **Table S5. Chromatin states (S1-S13) and transcript abundances (measured as TPM) for all**  
684 ***Ectocarpus* genes in males and females.** FBG, female-biased gene; MBG, male-biased gene.  
685 For the chromatin states, refer to Figure 1A. Genes that did not pass the manual inspection  
686 (see methods) and were excluded from the analysis of chromatin state transitions are marked  
687 in grey.

688 **Table S6. Pairwise Wilcoxon tests for statistical differences between the expression levels**  
689 **of genes associated with specific chromatin states (Figure 2A).** S, Chromatin states (S1 to  
690 S13); F, females; M, males. The values indicate pairwise Wilcoxon test p-values corrected for  
691 multiple comparisons. For the chromatin states, refer to Figure 1A.

692 **Table S7. GO term enrichment for genes associated with each of the chromatin states in**  
693 **males and females.** All significantly enriched Biological Process GO terms identified using  
694 Blast2GO are presented.

695 **Table S8. Number of sex-biased genes in each of the chromatin states S1-S13 in males and**  
696 **females.** FBG, female-biased gene, MBG, male-biased gene

697 **Table S9. Transitions between chromatin states observed for male-biased and female-**  
698 **biased genes in males compared with females.** For chromatin states, refer to Figure 1A.

699 **Table S10. Coverage of the five histone PTMs across male and female genomes.** The sex  
700 chromosome (chromosome 13) is divided into PAR1 (pseudo-autosomal region 1), SDR (sex-  
701 determining region) and PAR2 (pseudo-autosomal region 2).

702 **Table S11. Permutation tests performed to determine whether the relative proportions of**  
703 **the different chromatin states were statistically different in different regions of the genome.**

704 We randomized the genomic location of autosomal genes 100,000 times and tested the  
705 difference between the observed proportions for the SDR, the PAR or the entire sex  
706 chromosome and the permuted gene sets using chi-square statistics. Tests were performed  
707 independently for each chromatin state. Significant p-values (<0.05) are highlighted in bold.

708 **Table S12. Chromatin states of PAR genes in males and females.**

709 **Table S13. Chromatin states and transcript abundances ( $\log_2\text{TPM}+1$ ) for SDR genes** (see also  
710 Figure 4F).

711 **Table S14. The presence of transposon sequences in the majority (80%) of PAR genes does**  
712 **not explain the distinct chromatin landscape of the PAR.** Correlation between the presence  
713 of transposable elements within introns and the presence of H4K20me3 in PAR genes and  
714 autosomal genes (left table). Permutation tests comparing the proportion of each chromatin  
715 state in the PAR with the proportion of that state in 100,000 samples of 430 autosomal genes  
716 with transposon sequences in 80% of the genes. For most chromatin states, the proportion on  
717 the PAR was significantly different from those of the autosomal gene samples indicating that  
718 transposon content does not explain the unusual pattern of chromatin states observed for the  
719 PAR. Significant p-values (<0.05) are highlighted in bold (right table).

720 **Table S15. Comparison of chromatin states of the PAR genes with those of a set of autosomal**  
721 **genes with a similar pattern of gene expression levels.** To establish the autosomal gene set,  
722 for each PAR gene, the full set of autosomal genes was searched for the gene that had the  
723 most similar level of expression. When the TPM of the PAR gene was zero, an autosomal gene  
724 with a TPM of zero was selected at random. Figure S6 presents the proportions of chromatin  
725 states associated with the two gene sets.

726 **Table S16. Linear models to test whether there was a significant correlation between**  
727 **expression level ( $\log_2(\text{TPM} + 1)$ ) and chromatin state (upper table) or to test whether**  
728 **location of a gene on the PAR or on an autosome significantly influenced the expression**  
729 **level associated with each chromatin state (bottom table).** Significant interaction terms, in  
730 bold, represent a significantly different effect of the chromatin state on gene expression level  
731 in the PAR region compared to autosomal genes. None of the interaction terms between SDR  
732 and chromatin state showed a significant effect on gene expression so they are not reported  
733 in the table (likelihood ratio test; p-value=0.460 and p-value 0.304 for female and male SDR  
734 respectively).

735

## 736 Acknowledgements

737 We thank Carl Herrmann and Swann Floc'hlay for advice about ChIP-seq analysis, Thomas  
738 Broquet for discussions on the statistical analysis and Maxim Bruto for help with the Circos  
739 visualisation. We thank the Institut Français de Bioinformatique and the Roscoff Analysis and  
740 Bioinformatics for Marine Science platform ABiMS (<http://abims.sb-roscoff.fr>) for providing  
741 computing and data storage resources. This work was supported by the CNRS, Sorbonne  
742 Université, an ERC starting grant to S.M.C. (638240) and the Agence Nationale de la Recherche  
743 project Epicycle (ANR-19-CE20-0028-01).

## 744 References

- 745 Ahmed S, Cock JM, Pessia E, Luthringer R, Cormier A, Robuchon M, Sterck L, Peters AF, Dittami  
746 SM, Corre E, Valero M, Aury J-M, Roze D, Van de Peer Y, Bothwell J, Marais GAB, Coelho  
747 SM. 2014. A haploid system of sex determination in the brown alga *Ectocarpus* sp. *Curr*  
748 *Biol* **24**:1945–1957. doi:10.1016/j.cub.2014.07.042
- 749 Alexa A, Rahnenfuhrer J. 2020. Enrichment Analysis for Gene Ontology.
- 750 Allis CD, Jenuwein T. 2016. The molecular hallmarks of epigenetic control. *Nature Reviews*  
751 *Genetics* **17**:487.
- 752 Andrews S. 2016. FastQC A Quality Control tool for High Throughput Sequence Data.  
753 <http://www.bioinformatics.babraham.ac.uk/projects/fastqc/>.
- 754 Avia K, Lipinska AP, Mignerot L, Montecinos AE, Jamy M, Ahmed S, Valero M, Peters AF, Cock  
755 JM, Roze D, Coelho SM. 2018. Genetic diversity in the UV sex chromosomes of the  
756 brown alga *Ectocarpus*. *Genes (Basel)* **9**. doi:10.3390/genes9060286
- 757 Bachtrog D. 2013. Y chromosome evolution: emerging insights into processes of Y  
758 chromosome degeneration. *Nature reviews Genetics* **14**:113–124.  
759 doi:10.1038/nrg3366
- 760 Bachtrog D. 2006. A dynamic view of sex chromosome evolution. *Curr Opin Genet Dev* **16**:578–  
761 585. doi:10.1016/j.gde.2006.10.007
- 762 Bachtrog D, Mank JE, Peichel CL, Kirkpatrick M, Otto SP, Ashman T-L, Hahn MW, Kitano J,  
763 Mayrose I, Ming R, Perrin N, Ross L, Valenzuela N, Vamosi JC. 2014. Sex determination:  
764 why so many ways of doing it? *PLoS Biol* **12**:e1001899.  
765 doi:10.1371/journal.pbio.1001899
- 766 Baker BS, Gorman M, Marin I. 1994. Dosage compensation in *Drosophila*. *Annu Rev Genet*  
767 **28**:491–521. doi:10.1146/annurev.ge.28.120194.002423
- 768 Baroux C, Raissig MT, Grossniklaus U. 2011. Epigenetic regulation and reprogramming during  
769 gamete formation in plants. *Current Opinion in Genetics & Development* **21**:124–133.  
770 doi:10.1016/j.gde.2011.01.017
- 771 Barski A, Cuddapah S, Cui K, Roh T-Y, Schones DE, Wang Z, Wei G, Chepelev I, Zhao K. 2007.  
772 High-resolution profiling of histone methylations in the human genome. *Cell* **129**:823–  
773 837. doi:10.1016/j.cell.2007.05.009

- 774 Bell O, Conrad T, Kind J, Wirbelauer C, Akhtar A, Schubeler D. 2008. Transcription-coupled  
775 methylation of histone H3 at lysine 36 regulates dosage compensation by enhancing  
776 recruitment of the MSL complex in *Drosophila melanogaster*. *Mol Cell Biol* **28**:3401–  
777 3409. doi:10.1128/MCB.00006-08
- 778 Bioni L, Batlle-Morera L, Bird AP, Suzuki M, McQueen HA. 2005. Female-specific  
779 hyperacetylation of histone H4 in the chicken Z chromosome. *Chromosome Res*  
780 **13**:205–214. doi:10.1007/s10577-005-1505-4
- 781 Bourdareau S, Tirichine L, Lombard B, Loew D, Scornet D, Coelho SM, Cock JM. 2020. Histone  
782 modifications during the life cycle of the brown alga *Ectocarpus*. *bioRxiv*  
783 2020.03.09.980763. doi:10.1101/2020.03.09.980763
- 784 Brockdorff N, Turner BM. 2015. Dosage compensation in mammals. *Cold Spring Harb Perspect*  
785 *Biol* **7**:a019406. doi:10.1101/cshperspect.a019406
- 786 Brown EJ, Bachtrog D. 2014. The chromatin landscape of *Drosophila*: comparisons between  
787 species, sexes, and chromosomes. *Genome Res* **24**:1125–1137.  
788 doi:10.1101/gr.172155.114
- 789 Brusslan JA, Bonora G, Rus-Canterbury AM, Tariq F, Jaroszewicz A, Pellegrini M. 2015. A  
790 Genome-Wide Chronological Study of Gene Expression and Two Histone  
791 Modifications, H3K4me3 and H3K9ac, during Developmental Leaf Senescence. *Plant*  
792 *Physiol* **168**:1246–1261. doi:10.1104/pp.114.252999
- 793 Bull JJ. 1978. Sex Chromosomes in Haploid Dioecy: A Unique Contrast to Muller's Theory for  
794 Diploid Dioecy. *The American Naturalist* **112**:245–250. doi:10.1086/283267
- 795 Charlesworth B, Charlesworth D. 2000. The degeneration of Y chromosomes. *Philos Trans R*  
796 *Soc Lond B Biol Sci* **355**:1563–1572. doi:10.1098/rstb.2000.0717
- 797 Charlesworth D. 2017. Evolution of recombination rates between sex chromosomes. *Philos*  
798 *Trans R Soc Lond B Biol Sci* **372**. doi:10.1098/rstb.2016.0456
- 799 Cock JM, Sterck L, Rouzé P, Scornet D, Allen AE, Amoutzias G, Anthouard V, Artiguenave F,  
800 Aury J-M, Badger JH, Beszteri B, Billiau K, Bonnet E, Bothwell JH, Bowler C, Boyen C,  
801 Brownlee C, Carrano CJ, Charrier B, Cho GY, Coelho SM, Collén J, Corre E, Da Silva C,  
802 Delage L, Delaroque N, Dittami SM, Doulebeau S, Elias M, Farnham G, Gachon CMM,  
803 Gschloessl B, Heesch S, Jabbari K, Jubin C, Kawai H, Kimura K, Kloareg B, Küpper FC,  
804 Lang D, Le Bail A, Leblanc C, Lerouge P, Lohr M, Lopez PJ, Martens C, Maumus F, Michel  
805 G, Miranda-Saavedra D, Morales J, Moreau H, Motomura T, Nagasato C, Napoli CA,  
806 Nelson DR, Nyvall-Collén P, Peters AF, Pommier C, Potin P, Poulain J, Quesneville H,  
807 Read B, Rensing SA, Ritter A, Rousvoal S, Samanta M, Samson G, Schroeder DC,  
808 Séguens B, Strittmatter M, Tonon T, Tregear JW, Valentin K, von Dassow P, Yamagishi  
809 T, Van de Peer Y, Wincker P. 2010. The *Ectocarpus* genome and the independent  
810 evolution of multicellularity in brown algae. *Nature* **465**:617–621.  
811 doi:10.1038/nature09016
- 812 Coelho SM, Gueno J, Lipinska AP, Cock JM, Umen JG. 2018. UV chromosomes and haploid  
813 sexual systems. *Trends Plant Sci* **23**:794–807. doi:10.1016/j.tplants.2018.06.005
- 814 Coelho SM, Mignerot L, Cock JM. 2019. Origin and evolution of sex-determination systems in  
815 the brown algae. *New Phytologist* **10.1111/nph.15694**. doi:10.1111/nph.15694

- 816 Coelho SM, Scornet D, Rousvoal S, Peters NT, Darteville L, Peters AF, Cock JM. 2012. How to  
817 cultivate *Ectocarpus*. *Cold Spring Harb Protoc* **2012**:258–261.  
818 doi:10.1101/pdb.prot067934
- 819 Cormier A, Avia K, Sterck L, Derrien T, Wucher V, Andres G, Monsoor M, Godfroy O, Lipinska  
820 A, Perrineau M-M, Van De Peer Y, Hitte C, Corre E, Coelho SM, Cock JM. 2017a. Re-  
821 annotation, improved large-scale assembly and establishment of a catalogue of  
822 noncoding loci for the genome of the model brown alga *Ectocarpus*. *New Phytol*  
823 **214**:219–232. doi:10.1111/nph.14321
- 824 Cormier A, Avia K, Sterck L, Derrien T, Wucher V, Andres G, Monsoor M, Godfroy O, Lipinska  
825 A, Perrineau M-M, Van De Peer Y, Hitte C, Corre E, Coelho SM, Cock JM. 2017b. Re-  
826 annotation, improved large-scale assembly and establishment of a catalogue of  
827 noncoding loci for the genome of the model brown alga *Ectocarpus*. *New Phytol*  
828 **214**:219–232. doi:10.1111/nph.14321
- 829 Creighton MP, Cheng AW, Welstead GG, Kooistra T, Carey BW, Steine EJ, Hanna J, Lodato MA,  
830 Frampton GM, Sharp PA, Boyer LA, Young RA, Jaenisch R. 2010. Histone H3K27ac  
831 separates active from poised enhancers and predicts developmental state.  
832 *Proceedings of the National Academy of Sciences* **107**:21931–21936.  
833 doi:10.1073/pnas.1016071107
- 834 de la Paz Sanchez M, Gutierrez C. 2009. *Arabidopsis* ORC1 is a PHD-containing  
835 H3K4me3 effector that regulates transcription. *Proc Natl Acad Sci USA* **106**:2065.  
836 doi:10.1073/pnas.0811093106
- 837 Diaz A, Park K, Lim DA, Song JS. 2012. Normalization, bias correction, and peak calling for ChIP-  
838 seq. *Stat Appl Genet Mol Biol* **11**:Article 9. doi:10.1515/1544-6115.1750
- 839 Elango N, Hunt BG, Goodisman MAD, Yi SV. 2009. DNA methylation is widespread and  
840 associated with differential gene expression in castes of the honeybee, *Apis mellifera*.  
841 *Proc Natl Acad Sci U S A* **106**:11206–11211. doi:10.1073/pnas.0900301106
- 842 Filion GJ, van Bemmelen JG, Braunschweig U, Talhout W, Kind J, Ward LD, Brugman W, de Castro  
843 IJ, Kerkhoven RM, Bussemaker HJ, van Steensel B. 2010. Systematic protein location  
844 mapping reveals five principal chromatin types in *Drosophila* cells. *Cell* **143**:212–224.  
845 doi:10.1016/j.cell.2010.09.009
- 846 Fischer A, Hofmann I, Naumann K, Reuter G. 2006. Heterochromatin proteins and the control  
847 of heterochromatic gene silencing in *Arabidopsis*. *J Plant Physiol* **163**:358–368.  
848 doi:10.1016/j.jplph.2005.10.015
- 849 Gelbart ME, Kuroda MI. 2009. *Drosophila* dosage compensation: a complex voyage to the X  
850 chromosome. *Development* **136**:1399–1410. doi:10.1242/dev.029645
- 851 Girton JR, Johansen KM. 2008. Chromatin structure and the regulation of gene expression: the  
852 lessons of PEV in *Drosophila*. *Adv Genet* **61**:1–43. doi:10.1016/S0065-2660(07)00001-  
853 6
- 854 Grath S, Parsch J. 2016. Sex-Biased Gene Expression. *Annu Rev Genet* **50**:29–44.  
855 doi:10.1146/annurev-genet-120215-035429

- 856 Hansen P, Hecht J, Ibn-Salem J, Menkuec BS, Roskosch S, Truss M, Robinson PN. 2016. Q-  
857 nexus: a comprehensive and efficient analysis pipeline designed for ChIP-nexus. *BMC*  
858 *Genomics* **17**:873. doi:10.1186/s12864-016-3164-6
- 859 He G, Zhu X, Elling AA, Chen L, Wang X, Guo L, Liang M, He H, Zhang H, Chen F, Qi Y, Chen R,  
860 Deng X-W. 2010. Global epigenetic and transcriptional trends among two rice  
861 subspecies and their reciprocal hybrids. *Plant Cell* **22**:17–33.  
862 doi:10.1105/tpc.109.072041
- 863 Heintzman ND, Stuart RK, Hon G, Fu Y, Ching CW, Hawkins RD, Barrera LO, Van Calcar S, Qu C,  
864 Ching KA, Wang W, Weng Z, Green RD, Crawford GE, Ren B. 2007. Distinct and  
865 predictive chromatin signatures of transcriptional promoters and enhancers in the  
866 human genome. *Nat Genet* **39**:311–318. doi:10.1038/ng1966
- 867 Howe FS, Fischl H, Murray SC, Mellor J. 2017. Is H3K4me3 instructive for transcription  
868 activation? *Bioessays* **39**:1–12. doi:10.1002/bies.201600095
- 869 Huang C, Zhu B. 2018. Roles of H3K36-specific histone methyltransferases in transcription:  
870 antagonizing silencing and safeguarding transcription fidelity. *Biophys Rep* **4**:170–177.  
871 doi:10.1007/s41048-018-0063-1
- 872 Jones PA. 2012. Functions of DNA methylation: islands, start sites, gene bodies and beyond.  
873 *Nat Rev Genet* **13**:484–492. doi:10.1038/nrg3230
- 874 Kim D, Pertea G, Trapnell C, Pimentel H, Kelley R, Salzberg SL. 2013. TopHat2: accurate  
875 alignment of transcriptomes in the presence of insertions, deletions and gene fusions.  
876 *Genome Biol* **14**:R36. doi:10.1186/gb-2013-14-4-r36
- 877 Kouzarides T. 2007. Chromatin modifications and their function. *Cell* **128**:693–705.  
878 doi:10.1016/j.cell.2007.02.005
- 879 Krzywinski M, Schein J, Birol I, Connors J, Gascoyne R, Horsman D, Jones SJ, Marra MA. 2009.  
880 Circos: an information aesthetic for comparative genomics. *Genome Res* **19**:1639–  
881 1645. doi:10.1101/gr.092759.109
- 882 Landt SG, Marinov GK, Kundaje A, Kheradpour P, Pauli F, Batzoglou S, Bernstein BE, Bickel P,  
883 Brown JB, Cayting P, Chen Y, DeSalvo G, Epstein C, Fisher-Aylor KI, Euskirchen G,  
884 Gerstein M, Gertz J, Hartemink AJ, Hoffman MM, Iyer VR, Jung YL, Karmakar S, Kellis  
885 M, Kharchenko PV, Li Q, Liu T, Liu XS, Ma L, Milosavljevic A, Myers RM, Park PJ, Pazin  
886 MJ, Perry MD, Raha D, Reddy TE, Rozowsky J, Shores N, Sidow A, Slattery M,  
887 Stamatoyannopoulos JA, Tolstorukov MY, White KP, Xi S, Farnham PJ, Lieb JD, Wold BJ,  
888 Snyder M. 2012. ChIP-seq guidelines and practices of the ENCODE and modENCODE  
889 consortia. *Genome Research* **22**:1813–1831. doi:10.1101/gr.136184.111
- 890 Langmead B, Trapnell C, Pop M, Salzberg SL. 2009. Ultrafast and memory-efficient alignment  
891 of short DNA sequences to the human genome. *Genome Biol* **10**:R25. doi:10.1186/gb-  
892 2009-10-3-r25
- 893 Lemos B, Branco AT, Hartl DL. 2010. Epigenetic effects of polymorphic Y chromosomes  
894 modulate chromatin components, immune response, and sexual conflict. *Proc Natl*  
895 *Acad Sci U S A* **107**:15826–15831. doi:10.1073/pnas.1010383107

- 896 Lerdrup M, Johansen JV, Agrawal-Singh S, Hansen K. 2016. An interactive environment for  
897 agile analysis and visualization of ChIP-sequencing data. *Nat Struct Mol Biol* **23**:349–  
898 357. doi:10.1038/nsmb.3180
- 899 Lesch BJ, Page DC. 2013. Sex-specific chromatin states in mammalian fetal germ cells.  
900 *Epigenetics Chromatin* **6**:P45–P45. doi:10.1186/1756-8935-6-S1-P45
- 901 Li H, Handsaker B, Wysoker A, Fennell T, Ruan J, Homer N, Marth G, Abecasis G, Durbin R, 1000  
902 Genome Project Data Processing Subgroup. 2009. The Sequence Alignment/Map  
903 format and SAMtools. *Bioinformatics* **25**:2078–2079.  
904 doi:10.1093/bioinformatics/btp352
- 905 Liao Y, Smyth GK, Shi W. 2014. featureCounts: an efficient general purpose program for  
906 assigning sequence reads to genomic features. *Bioinformatics* **30**:923–930.  
907 doi:10.1093/bioinformatics/btt656
- 908 Lindeman LC, Winata CL, Aanes H, Mathavan S, Alestrom P, Collas P. 2010. Chromatin states  
909 of developmentally-regulated genes revealed by DNA and histone methylation  
910 patterns in zebrafish embryos. *Int J Dev Biol* **54**:803–813. doi:10.1387/ijdb.103081ll
- 911 Lipinska AP, D'hondt S, Van Damme EJ, De Clerck O. 2013. Uncovering the genetic basis for  
912 early isogamete differentiation: a case study of *Ectocarpus siliculosus*. *BMC Genomics*  
913 **14**:909–909. doi:10.1186/1471-2164-14-909
- 914 Lipinska AP, Serrano-Serrano ML, Cormier A, Peters AF, Kogame K, Cock JM, Coelho SM. 2019.  
915 Rapid turnover of life-cycle-related genes in the brown algae. *Genome Biol* **20**:35.  
916 doi:10.1186/s13059-019-1630-6
- 917 Lipinska AP, Toda NRT, Heesch S, Peters AF, Cock JM, Coelho SM. 2017. Multiple gene  
918 movements into and out of haploid sex chromosomes. *Genome Biol* **18**:104.  
919 doi:10.1186/s13059-017-1201-7
- 920 Lipinska, Cormier A, Luthringer R, Peters AF, Corre E, Gachon CMM, Cock JM, Coelho SM. 2015.  
921 Sexual dimorphism and the evolution of sex-biased gene expression in the brown alga  
922 *Ectocarpus*. *Mol Biol Evol* **32**:1581–1597. doi:10.1093/molbev/msv049
- 923 Love MI, Huber W, Anders S. 2014. Moderated estimation of fold change and dispersion for  
924 RNA-seq data with DESeq2. *Genome Biol* **15**:550. doi:10.1186/s13059-014-0550-8
- 925 Lucchesi JC, Kelly WG, Panning B. 2005. Chromatin remodeling in dosage compensation. *Annu*  
926 *Rev Genet* **39**:615–651. doi:10.1146/annurev.genet.39.073003.094210
- 927 Luthringer R, Lipinska AP, Roze D, Cormier A, Macaisne N, Peters AF, Cock JM, Coelho SM.  
928 2015. The pseudoautosomal regions of the U/V sex chromosomes of the brown alga  
929 *Ectocarpus* exhibit unusual features. *Mol Biol Evol* **32**:2973–2985.  
930 doi:10.1093/molbev/msv173
- 931 Margueron R, Reinberg D. 2010. Chromatin structure and the inheritance of epigenetic  
932 information. *Nat Rev Genet* **11**:285–296. doi:10.1038/nrg2752
- 933 Martin M. 2011. Cutadapt removes adapter sequences from high-throughput sequencing  
934 reads. *EMBnet* 10–12. doi:https://doi.org/10.14806/ej.17.1.200
- 935 Mignerot L, Coelho SM. 2016. The origin and evolution of the sexes: Novel insights from a  
936 distant eukaryotic lineage. *C R Biol* **339**:252–257. doi:10.1016/j.crvi.2016.04.012

- 937 Nelson DM, Jaber-Hijazi F, Cole JJ, Robertson NA, Pawlikowski JS, Norris KT, Criscione SW,  
938 Pchelintsev NA, Piscitello D, Stong N, Rai TS, McBryan T, Otte GL, Nixon C, Clark W,  
939 Riethman H, Wu H, Schotta G, Garcia BA, Neretti N, Baird DM, Berger SL, Adams PD.  
940 2016. Mapping H4K20me3 onto the chromatin landscape of senescent cells indicates  
941 a function in control of cell senescence and tumor suppression through preservation  
942 of genetic and epigenetic stability. *Genome Biology* **17**:158. doi:10.1186/s13059-016-  
943 1017-x
- 944 Nugent BM, Wright CL, Shetty AC, Hodes GE, Lenz KM, Mahurkar A, Russo SJ, Devine SE,  
945 McCarthy MM. 2015. Brain feminization requires active repression of masculinization  
946 via DNA methylation. *Nat Neurosci* **18**:690–697. doi:10.1038/nn.3988
- 947 Picard MAL, Cosseau C, Ferre S, Quack T, Grevelding CG, Coute Y, Vicoso B. 2018. Evolution of  
948 gene dosage on the Z-chromosome of schistosome parasites. *Elife* **7**.  
949 doi:10.7554/eLife.35684
- 950 Picard MAL, Vicoso B, Roquis D, Bulla I, Augusto RC, Arancibia N, Grunau C, Boissier J, Cosseau  
951 C. 2019. Dosage Compensation throughout the *Schistosoma mansoni* Lifecycle:  
952 Specific Chromatin Landscape of the Z Chromosome. *Genome Biol Evol* **11**:1909–1922.  
953 doi:10.1093/gbe/evz133
- 954 Quinlan AR, Hall IM. 2010. BEDTools: a flexible suite of utilities for comparing genomic  
955 features. *Bioinformatics* **26**:841–842. doi:10.1093/bioinformatics/btq033
- 956 Ramirez F, Dundar F, Diehl S, Gruning BA, Manke T. 2014. deepTools: a flexible platform for  
957 exploring deep-sequencing data. *Nucleic Acids Res* **42**:W187–191.  
958 doi:10.1093/nar/gku365
- 959 Roudier F, Ahmed I, Bérard C, Sarazin A, Mary-Huard T, Cortijo S, Bouyer D, Caillieux E,  
960 Duvernois-Berthet E, Al-Shikhley L, Giraut L, Després B, Drevensek S, Barneche F,  
961 Dèrozier S, Brunaud V, Aubourg S, Schnittger A, Bowler C, Martin-Magniette M-L,  
962 Robin S, Caboche M, Colot V. 2011. Integrative epigenomic mapping defines four main  
963 chromatin states in *Arabidopsis*. *The EMBO Journal* **30**:1928–1938.  
964 doi:10.1038/emboj.2011.103
- 965 Schmid MW, Giraldo-Fonseca A, Rovekamp M, Smetanin D, Bowman JL, Grossniklaus U. 2018.  
966 Extensive epigenetic reprogramming during the life cycle of *Marchantia polymorpha*.  
967 *Genome Biol* **19**:9. doi:10.1186/s13059-017-1383-z
- 968 Schotta G, Lachner M, Sarma K, Ebert A, Sengupta R, Reuter G, Reinberg D, Jenuwein T. 2004.  
969 A silencing pathway to induce H3-K9 and H4-K20 trimethylation at constitutive  
970 heterochromatin. *Genes Dev* **18**:1251–1262. doi:10.1101/gad.300704
- 971 She W, Baroux C. 2015. Chromatin dynamics in pollen mother cells underpin a common  
972 scenario at the somatic-to-reproductive fate transition of both the male and female  
973 lineages in *Arabidopsis*. *Front Plant Sci* **6**:294. doi:10.3389/fpls.2015.00294
- 974 Shilatifard A. 2006. Chromatin modifications by methylation and ubiquitination: implications  
975 in the regulation of gene expression. *Annu Rev Biochem* **75**:243–269.  
976 doi:10.1146/annurev.biochem.75.103004.142422
- 977 Srivastava S, Mishra RK, Dhawan J. 2010. Regulation of cellular chromatin state: insights from  
978 quiescence and differentiation. *Organogenesis* **6**:37–47. doi:10.4161/org.6.1.11337



- 979 Straub T, Becker PB. 2007. Dosage compensation: the beginning and end of generalization.  
980 *Nat Rev Genet* **8**:47–57. doi:10.1038/nrg2013
- 981 Umen J, Coelho S. 2019. Algal Sex Determination and the Evolution of Anisogamy. *Annu Rev*  
982 *Microbiol.* doi:10.1146/annurev-micro-020518-120011
- 983 Vicoso B, Charlesworth B. 2009. Effective population size and the faster-X effect: an extended  
984 model. *Evolution* **63**:2413–2426. doi:10.1111/j.1558-5646.2009.00719.x
- 985 Xu S, Grullon S, Ge K, Peng W. 2014. Spatial clustering for identification of ChIP-enriched  
986 regions (SICER) to map regions of histone methylation patterns in embryonic stem  
987 cells. *Methods Mol Biol* **1150**:97–111. doi:10.1007/978-1-4939-0512-6\_5
- 988 Yanai I, Benjamin H, Shmoish M, Chalifa-Caspi V, Shklar M, Ophir R, Bar-Even A, Horn-Saban S,  
989 Safran M, Domany E, Lancet D, Shmueli O. 2005. Genome-wide midrange transcription  
990 profiles reveal expression level relationships in human tissue specification.  
991 *Bioinformatics* **21**:650–659. doi:10.1093/bioinformatics/bti042
- 992 Yasuhara JC, Wakimoto BT. 2008. Molecular landscape of modified histones in *Drosophila*  
993 heterochromatic genes and euchromatin-heterochromatin transition zones. *PLoS*  
994 *Genet* **4**:e16. doi:10.1371/journal.pgen.0040016
- 995 Zang C, Schones DE, Zeng C, Cui K, Zhao K, Peng W. 2009. A clustering approach for  
996 identification of enriched domains from histone modification ChIP-Seq data.  
997 *Bioinformatics* **25**:1952–1958. doi:10.1093/bioinformatics/btp340
- 998 Zhang Y, Liu T, Meyer CA, Eeckhoute J, Johnson DS, Bernstein BE, Nusbaum C, Myers RM,  
999 Brown M, Li W, Liu XS. 2008. Model-based analysis of ChIP-Seq (MACS). *Genome Biol*  
1000 **9**:R137. doi:10.1186/gb-2008-9-9-r137  
1001
